# 1 **Transcriptomic signature on Hantavirus Cardiopulmonary Syndrome** 2 **patients, reveals an increased interferon response as a hallmark of critically ill** 3 **patients**

4  
5 Grazielle E. Ribeiro <sup>1</sup>, Eduardo Duran-Jara <sup>1</sup>, Ruth Perez <sup>1</sup>, Analia Cuiza <sup>1</sup>, Luis E. Leon <sup>2</sup>,  
6 Constanza Martínez-Valdebenito <sup>3</sup>, Nicole Le Corre <sup>3</sup>, Marcela Ferres <sup>3</sup>, Leonila Ferreira<sup>4</sup>, Maria  
7 Luisa Rioseco<sup>5</sup>, Jorge Gavilán<sup>6</sup>, Francisco Arancibia<sup>6</sup>, Jerónimo Graf <sup>7</sup>, Rene Lopez<sup>7</sup>, Jose Luis  
8 Perez<sup>8</sup>, Mario Calvo<sup>9</sup>, Gregory J Mertz<sup>10</sup>, Pablo A. Vial <sup>1,11</sup>, Cecilia Vial <sup>1\*</sup> and the hantavirus  
9 study group.

10 <sup>1</sup> Instituto de Ciencias e Innovación en Medicina, Facultad de Medicina, Clínica Alemana  
11 Universidad del Desarrollo, Santiago, Chile

12 <sup>2</sup> Instituto de Ciencias Biomédicas, Facultad de Ciencias de la Salud, Universidad Autónoma de  
13 Chile, Santiago, Chile

14 <sup>3</sup> Departamento de Enfermedades Infecciosas e Inmunología Pediátricas, Pontificia Universidad  
15 Católica de Chile, Santiago, Chile

16 <sup>4</sup> Hospital Dr. Guillermo Grant Benavente Concepción, Concepción, Chile

17 <sup>5</sup> Hospital Puerto Montt Dr. Eduardo Schütz Schroeder, Puerto Montt, Chile

18 <sup>6</sup> Instituto Nacional del Tórax, Santiago, Chile

19 <sup>7</sup> Departamento de Paciente Crítico, Clínica Alemana de Santiago, Santiago, Chile

20 <sup>8</sup> Hospital Base San José de Osorno, Osorno, Chile.

21 <sup>9</sup> Instituto de Medicina, Universidad Austral de Chile - Hospital Base Valdivia, Valdivia, Chile.

22 <sup>10</sup> Department of Internal Medicine, University of New Mexico, Albuquerque, USA

23 <sup>11</sup> Departamento Pediatría Clínica Alemana de Santiago, Santiago, Chile

24

25 \* Correspondence: [mcvial@udd.cl](mailto:mcvial@udd.cl); Tel.: +56225-785-772.

26

27 **Short Title:** Transcriptome analysis in HCPS patients

28

29 **Abstract:** New World hantaviruses are important human pathogens that can cause a severe  
30 zoonotic disease called hantavirus cardiopulmonary syndrome (HCPS). HCPS patients can  
31 progress quickly to a severe condition with respiratory failure and cardiogenic shock that can be  
32 fatal in 30% of the cases. The role of the host's immune responses in this progression towards  
33 HCPS remains elusive. In this study, 12 patients hospitalized with severe HCPS were analyzed  
34 using a transcriptome approach combined with clinical laboratory data to gain a better insight  
35 into factors associated with a severe clinical course. Patients were further classified in two levels

36 of severity, a first group that required mechanical ventilation and vasoactive drugs (VM+VD)  
37 and a second group that also needed ECMO or died (ECMO/Fatal). Their transcriptional profile  
38 was compared during acute (early and late) and convalescent phases. Our results showed that  
39 overexpression of the interferon response is correlated with a worse (ECMO/Fatal) outcome and  
40 an increased viral load and proinflammatory cytokines in the early-acute-phase. This report  
41 provides insights into the differences in innate immune activation between severe patients that  
42 associates with different clinical outcomes, using a non-biased approximation.

43

44 **Author Summary:** Hantavirus are rodent-borne zoonotic pathogens that when transmitted to  
45 humans cause two diseases: hantavirus renal syndrome in Europe and Asia, and hantavirus  
46 cardiopulmonary syndrome (HCPS) in the Americas. The latter, the goal of this work, is a  
47 highly lethal disease with a case fatality rate of 30%. Moreover no specific treatment or vaccine  
48 is available for this disease. In this study, we analyzed hospitalized HCPS patients with severe  
49 disease, to understand how they respond to hantavirus infection. We used a method that can  
50 measure every mRNA that is being transcribed in one moment (transcriptome analysis) and thus  
51 provide an accurate idea of how cells (specifically peripheral blood mononuclear cells) are  
52 responding to infection. The knowledge gained in this study helps us further understand the  
53 pathogenesis of this disease and might help us to design specific therapies to treat it.

54

## 55 **Introduction**

56

57 *Orthohantavirus* (known as hantaviruses) is a family of single-stranded, enveloped,  
58 negative-sense RNA viruses that belong to the *Hantaviridae* family of the order *Bunyavirales*[1].

59 Pathogenic Orthohantaviruses can cause two severe human zoonotic diseases: hemorrhagic fever  
60 with renal syndrome (HFRS) in Europe and Asia and hantavirus cardiopulmonary syndrome  
61 (HCPS) on the American continent, with a case fatality rate up to 30% [2]. *Andes*  
62 *orthohantavirus* (ANDV) is one of South American HCPS causing hantavirus and the only  
63 hantavirus that is known to transmit from person to person [3,4]. After an individual gets  
64 infected, the incubation period lasts from seven to 42 days [5,6]. Then a prodromal phase of  
65 three to six days starts characterized by nonspecific symptoms including fever, headache and  
66 myalgia. Patients may progress to the cardiopulmonary phase which in severe disease is  
67 characterized by respiratory symptoms that start with dry cough and evolve to respiratory failure  
68 needing mechanical ventilation due to a massive capillary leak into the lung interstitium [7,8].  
69 Severe patients present with circulatory shock and cardiovascular depression that require use of  
70 vasoactive drugs [7,9]. Since there is not a vaccine for this deadly disease nor a specific  
71 treatment, treatment is based on critical care support. A proportion of these severe patients have  
72 a more critical illness that needs extracorporeal membrane oxygenation (ECMO) support and  
73 about one third die.

74 A common hallmark of HCPS is the increased immune activation and vascular  
75 permeability that develops during the cardiopulmonary phase producing pulmonary edema and  
76 cardiogenic shock in the most severe cases [7]. Viremia is present during the incubation period  
77 for up to two weeks before onset of symptoms or appearance of IgM and IgG antibodies [3].  
78 Orthohantaviruses systemically infect and replicate predominantly in endothelial cells (ECs)  
79 [10,11], but can also infect epithelial and immune cells such as monocytes/macrophages and  
80 dendritic cells [10,12–18]. Hantaviruses do not cause a cytopathic effect [10,11] suggesting that  
81 their pathogenic effects are caused rather by the host immune response during infection, which

82 includes a cytokine storm [19]. Increased serum levels of proinflammatory cytokines, such as  
83 IL-6, IFN- $\gamma$  and TNF- $\alpha$ , along with high infiltration of mononuclear cells, mainly CD4<sup>+</sup> and  
84 CD8<sup>+</sup> T lymphocytes in the lung, are associated with a severe outcome [20–22].

85 The innate immune response, which is the first reaction to a viral infection, could be one  
86 crucial step that modifies how the infected individual will respond to the virus. The regulation of  
87 the complement system, a significant component of innate immunity, could also influence the  
88 clinical course since deletion in regulatory genes (CFHR1 and CFHR3) have been found to be  
89 more frequent in severe HCPS patients [23].

90 The role of the host's immune responses in the progression of HCPS and their association  
91 with severity remains elusive. In this study, we applied a non-biased, transcriptome approach  
92 combined with clinical laboratory data in a cohort of ANDV-infected patients that developed a  
93 severe clinical course to explore the factors associated with HCPS severity.

94 This report provides a comprehensive description of innate immune programs active in  
95 PBMCs during acute HCPS patients. Increased type I IFN response, specifically the  
96 overexpression of interferon-induced genes (ISGs), is associated with a more severe outcome,  
97 defined as patients requiring ECMO or died, and to increased viral load in Peripheral Blood  
98 Mononuclear Cells (PBMCs) and increased proinflammatory cytokines levels in serum.

99

## 100 **Results**

101

### 102 **Characterization of studied participants**

103

104 Twelve patients, nine males and three females, with severe HCPS were analyzed in this

105 study. They had a median age of 27, nine being of European ancestry and three with Amerindian  
106 ancestry. The 12 HCPS patients were further reclassified into two groups according to their  
107 severity: MV+VD ( $n=5$ ) were those who received mechanical ventilation (MV) and vasoactive  
108 drugs (VD) as treatment, and ECMO/Fatal ( $n=7$ ) were those patients that also received ECMO as  
109 a treatment or died. The healthy control group ( $n=9$ ) consisted of four females and five males  
110 with a median age of 25 years. There was no difference between groups when comparing  
111 demographic data (Table 1). Clinical data including days of oxygen requirement, vasoactive  
112 drugs, mechanical ventilation, ECMO treatment, and hospitalization days were available for the  
113 cohort (Table 1). These values were similar between study groups except for the days in  
114 mechanical ventilation. White blood cells and platelet count, ANDV viral load in PBMCs,  
115 together with sub-population immunophenotyping of the earliest measurement (up to 48 hours  
116 after onset of cardiopulmonary symptoms) were also compared for these groups. There was no  
117 difference between groups on viral load, total leukocyte number, or neutrophil percentage,  
118 although a tendency of increase in viral load and a decrease in leukocyte count was observed in  
119 the ECMO/Fatal patients (Table 1). A significant difference was found in platelet count in the  
120 two HCPS groups compared to healthy controls, as previously described [24]. The blood  
121 immune cell populations were evaluated by flow cytometry in the first sample from each patient  
122 as described in the methods section. Although no significant difference was found, a trend  
123 towards an increase in T helper cells, CD56<sup>Bright</sup> NK cells and NKT cells, and a tendency for a  
124 decrease in cytotoxic T cells, NK cells, and B cells was observed in ECMO/Fatal patients  
125 compared to MV+VD ones.

126 The complete clinical course of the 12 HCPS patients in this study along with samples  
127 obtained is represented in Fig 1. The prodromic phase with non-specific symptoms varied

128 between three to ten days, and day 0 represents the onset of cardiopulmonary symptoms. Blood  
129 samples were collected during the acute phase (early acute between the days 0-2 and late acute  
130 samples between days 5-6 after the onset of cardiopulmonary symptoms). One last blood sample  
131 was collected in the convalescent-phase (day >60 after cardiopulmonary symptoms onset).  
132 Patients that only required mechanical ventilation and vasoactive drugs during their  
133 hospitalization were grouped in the MV+VD patients group. Patients requiring ECMO or that  
134 died were grouped together in the more severe ECMO/Fatal group of patients.

135

### 136 **PBMC transcriptome profile of HCPS patients by severity and clinical phase**

137

138 Total PBMC samples sequenced and analyzed are detailed in S1 Table. Briefly, after  
139 quality control filters, 16,187 genes were included in subsequent analyses. First, a  
140 multidimensional scaling (MDS) was performed to evaluate the global gene expression patterns  
141 between the samples to determine which variable explained the difference in the data. In MDS  
142 analysis two groups were observed: one integrated by healthy controls and convalescent-phase  
143 subjects and another group of acute-phase patients (Fig 2A). These results show that the greatest  
144 variability in subject's gene expression was produced by the infection itself. Interestingly, there  
145 was no clear separation between MV+VD and ECMO/Fatal patients in early or late-acute-phase.

146 Differential gene expression was conducted with the limma-voom analysis workflow using  
147 Benjamini and Hochberg (BH) correction for multiple testing. Differential expression analysis  
148 was performed by comparing samples from MV+VD and ECMO/Fatal HCPS patients in an  
149 early-acute, late-acute, and convalescent-phase with healthy controls. The total of differentially  
150 expressed genes (DEGs) in the MV+VD group was 277 in early and 109 in late-acute-phase; and

151 in ECMO/Fatal group DEGs were 310 in early and 342 in late-acute-phase (Fig 2B). IFI27 was  
152 the most overexpressed gene with highest Log2FC and lowest p-value in both groups of severe  
153 patients during the acute phase. Interestingly, proinflammatory cytokines, such as IL-6 and  
154 TNF- $\alpha$ , that are known to be increased in serum of severe HCPS patients, were not differentially  
155 expressed in MV+VD or ECMO/Fatal patients at any time when compared to healthy controls.  
156 Taken together, these results suggest that the increased serum levels of these cytokines could be a  
157 contribution of other cell types, such as endothelial cells and macrophages, rather than PBMCs.  
158 There were no statistically significant DEGs in the convalescent-phase when compared with  
159 healthy controls (Fig 2B). This suggests that at the convalescent-phase, patients have resolved  
160 the disease in terms of level of gene expression. At the level of clinical symptoms, some patients  
161 continued to be hospitalized because of ECMO complications, others experienced fatigue and  
162 mild respiratory distress at day 60, but the majority had returned to normal life. Fig 2C shows the  
163 expression profile of MV+VD and ECMO/Fatal HCPS patients at every time point. The total of  
164 439 DEGs were plotted in the heatmap. ECMO/Fatal patients showed a different signature  
165 compared to MV+VD patients during the acute phase in both early and late timepoints. As  
166 expected, HCPS patients in the convalescent-phase presented a pattern of expression similar to  
167 healthy controls. The number of shared and unique DEGs between MV+VD and ECMO/Fatal  
168 patients in an early and late acute-phase are shown in a Venn diagram (Fig 2D). There were 58  
169 genes differentially expressed only in MV+VD patients in an early-acute phase and 2 in a  
170 late-acute phase and 52 in ECMO/Fatal patients in an early-acute and 89 in a late-acute phase  
171 (Fig 2D). Ninety-one genes were shared throughout all conditions (MV+VD and ECMO/Fatal in  
172 an early and late-acute phase) compared to healthy controls (Fig 2D).

173

## 174 **Gene set enrichment analysis by severity and clinical phase**

175

176 To further define the biological function and pathways associated with a severe clinical  
177 course, we applied a gene set enrichment analysis called blood transcriptome module (BTM) as  
178 described [25,26]. BTMs are groups of genes that share a similar function, where BTM up- and  
179 downregulation is defined by the percentage of genes within each module that are differentially  
180 expressed. Activation of modules was tested comparing each study group to healthy controls and  
181 using the FDR-ranked lists of DEGs generated by limma and applying the tmod test. The BTMs  
182 with a  $p\text{-value} \leq 0.001$  were considered significant. When HCPS patients were analyzed together,  
183 a strong upregulation of Modules that group genes with functions in cell cycle, DNA repair,  
184 mitosis was observed (data not shown), which can be further observed when patients are  
185 re-classified in MV+VD and ECMO/Fatal groups (Fig 3). Moreover, this response is still active  
186 during the late-acute-phase but returns to normal values during convalescence. The enrichment  
187 observed in these pathways points to the immune activation that is taking place in both groups of  
188 severe patients and the lymphoid proliferation that is taking place during the acute-phase of the  
189 disease. On the other hand, when all HCPS patients were analyzed together, modules that  
190 grouped genes from the innate immune response were enriched during the early phase of the  
191 acute disease (data not shown). When these severe patients were reclassified as MV+VD and  
192 ECMO/Fatal, this association was only seen in the more severe group (ECMO/Fatal) during the  
193 early-acute phase (Fig 3, marked with arrows). These BTMs include a greater activation in  
194 antiviral IFN signature, IFN I signalling and innate antiviral response, activation in B cells and  
195 plasma cells and BTMS of activated dendritic cells. The comparison of expression of the  
196 significant genes belonging to these innate immune response marked modules, are shown in S2



197 Table. This data suggests that in ANDV-infected patients that develop HCPS, there is a strong  
198 innate immune response that is greater in the most severe ECMO/Fatal HCPS group of patients.  
199 Interestingly, these more severe ECMO/Fatal patients have an over-representation of innate  
200 immune pathways, especially genes participating in the interferon signaling pathway.

201

### 202 **DEGs in MV+VD and ECMO/Fatal HCPS patients in early-acute phase**

203

204 Once the functions of all DEGs between MV+VD and ECMO/Fatal patients in an  
205 early-late acute phase were described, unique genes for each severity group were analyzed. One  
206 of the interests of the study was to understand the factors associated with critical clinical courses  
207 at the onset of the cardiopulmonary phase, so further analyses were focused on unique DEGs of  
208 the early-acute phase. Transcriptional profiles of 110 genes that include 52 genes that were  
209 detected to be uniquely differentially expressed in ECMO/Fatal patients and 58 genes detected in  
210 MV+VD patients were analyzed. Fig 4 shows a clear difference in the expression profile of  
211 these genes between patients of different severities and healthy controls.

212 To evaluate the functions of these unique DEGs, a gene set enrichment analysis was  
213 performed separately for each group of genes (58 for MV+VD and 52 ECMO/Fatal). This  
214 method uses statistical approaches to identify significantly enriched or depleted groups of genes  
215 that participate in the same biological process. Thus, the functions which are exclusively altered  
216 in each group can be identified. No biological processes were found to be enriched in MV+VD  
217 patients compared to healthy controls. However, seven biological processes were enriched in  
218 ECMO/Fatal patients. These biological processes were mainly from innate immune response,  
219 primarily type I interferon response (Fig 4B). The detail of the genes belonging to these

220 biological processes is in the S3 Table. These results showed that genes associated with innate  
221 immune response, especially type I interferon response, were enriched only in ECMO/Fatal  
222 patients. This is in concordance to what was found on BTM analysis.

223

### 224 **Correlation between expression of BTM enriched exclusively in ECMO/Fatal patients and** 225 **clinical laboratory data**

226

227 To assess whether the expression of the genes from enriched BTMs in ECMO/Fatal  
228 patients in an early-acute-phase could impact the severity and clinical laboratory parameters, the  
229 expression of these BTMs was correlated with these patients' laboratory data (Fig 5 and detail in  
230 S4 Table). The BTMs associated with interferon response, including antiviral interferon  
231 signature (LI.M75), type I interferon response (LI.M127) and innate antiviral response  
232 (LI.M150); dendritic cells: activated dendritic cells (LI.M67) and enriched in activated dendritic  
233 cells (LI.M165); and plasma cells surface signature (LI.S3), showed a statistically positive  
234 correlation with ECMO/Fatal clinical course (Fig 5). The BTMs associated with interferon  
235 response (LI.M75, LI.M127, and LI.M150) are positively correlated with viral load, amount of  
236 NK cells and TNF- $\alpha$  serum levels. LI.M127 and LI.M150 are also positively correlated with the  
237 amount of NKT cells and IL-6 serum levels and negatively correlated with neutrophils  
238 percentage. The BTM activated dendritic cells (LI.M67) is positively correlated with NK cells,  
239 viral load, amount of NK, and Th cells. Platelets, leukocytes, CD3+, CD8+, CD56<sup>Bright</sup> NK cells  
240 did not show any statistically significant correlation with the enriched BTMs. Thus, the  
241 overexpression of interferon response genes is correlated with a ECMO/Fatal outcome and an  
242 increased viral load in PBMCs and proinflammatory cytokines (IL-6 and TNF- $\alpha$ ) serum levels

243 and could be contributing to immunopathogenesis instead of restricting viral replication. Having  
244 an increased type I interferon response appears to correlate to poor prognosis in HCPS patients.

245

## 246 **Discussion**

247

248 The host immune response is an important mechanism in the pathogenesis of HCPS. An  
249 exaggerated and uncontrolled activation of the innate and adaptive immune response is  
250 associated with severity [20,27–31]. In this study, we applied a transcriptome approach  
251 combined with clinical laboratory data to gain a better insight into factors associated with HCPS  
252 critical or fatal clinical course.

253 The human innate immune response, particularly type-I IFN response, is a highly robust  
254 and effective first line of defense against virus invasion. In infected and neighboring cells, type I  
255 IFNs induce the expression of IFN-stimulated genes (ISGs), the products of which initiate an  
256 intracellular antimicrobial program that limits the spread of infectious agents [32,33]. Failure to  
257 mount an effective IFN response against the virus leads to systemic infection, while excessive  
258 IFN production leads to pathogenicity, severe symptoms, or even fatality [34–36].

259 Our findings demonstrated that PBMCs transcriptome from the more severe ECMO/Fatal  
260 HCPS group of patients have a greater activation of the innate immune response in the earliest  
261 stages of the cardiopulmonary phase than in less severe MV+VD patients. BTMs associated with  
262 IFN response, dendritic, and plasma cells were enriched in the ECMO/Fatal patients between 0  
263 to 2 days after cardiopulmonary symptoms started. They also had upregulated genes associated  
264 with type I interferon response, whose main function is to negatively regulate viral replication  
265 (i.e., USP18, ISG15, IFIT3, IFIT1, MX1, IF6, IFI44L, IFITM3 and Siglec-1). In other viral

266 infections, such as Coronavirus disease 19 (COVID-19), severe patients have recently been  
267 characterized of having an up-regulation of various ISGs, including ISG15, IFITM1/2/3, and  
268 ISG20[31]; so, these unregulated type I IFN responses could be an important hallmark for  
269 severity in viral respiratory diseases. Interestingly, the BTMs enriched in the ECMO/fatal HCPS  
270 patients associated with type I IFN response (LI.M75, LI.M127, and LI.M150) were positively  
271 correlated with high viral load, proinflammatory cytokines (IL-6 and TNF- $\alpha$ ) serum levels and  
272 ECMO/Fatal clinical course. BTM associated with dendritic cells (LI.M67, LI.M165) were also  
273 positively correlated with viral load and ECMO/Fatal clinical course. This means that the higher  
274 the expression of type I IFN genes, the greater the viral load and proinflammatory response and  
275 consequently greater illness severity. Because the overexpression of interferon response genes is  
276 associated with a critical and fatal outcome, an increase in viral load in PBMCs and an increase  
277 in proinflammatory cytokines serum levels, it could rather be contributing to  
278 immunopathogenesis rather than restricting viral replication in these patients.

279 It has been known for decades that viruses evolve different strategies to escape the type I  
280 IFN response in order to replicate and disseminate successfully in their hosts [37]. *In vitro*  
281 experiments have shown that pathogenic hantaviruses can block early IFN responses, which  
282 favor an early viral replication in target cells, but later induce high-level ISG responses (1–4 days  
283 after infection) [13,38,39]. These observations correlate with HCPS natural history in which  
284 there is a long incubation period that can last up to 49 days, and viremia can be detected during  
285 this period up to 15 days before symptoms onset, suggesting a long escape of the virus to IFN  
286 response.

287 Moreover, *in vivo* experiments have shown that the treatment with IFN- $\beta$  could increase  
288 the survival of Hantaan (HTNV) infected mice only if performed less than 24 hours after

289 infection [40]. In this study we have shown that despite a strong interferon response in the  
290 ECMO/fatal HCPS patients, there is no correlation with a decrease in viral load. The findings of  
291 this study suggest that insensitivity to the interferon response occurs in ECMO/fatal HCPS  
292 patients and correlates with poor prognosis in HCPS patients. The molecular mechanisms by  
293 which hantaviruses become insensitive to the interferon response, specifically how they evade  
294 the response to ISGs once the infection is already established, is not yet known and should be  
295 studied further.

296 The mechanisms by which type I interferon response promotes severity in viral infections  
297 remains controversial and elusive. A common theme is emerging in which type I IFN has the  
298 potential to over activate the immune system during acute viral infection. Besides the induction  
299 of ISGs, type I IFN also induces secretion of cytokines and chemokines and activation of  
300 pathways that allow the clearance of infected cells [41,42]. Therefore, the induction of  
301 proinflammatory cytokines or chemokines or activation of apoptosis-inducing pathways to clear  
302 virally infected cells, which were designed to be protective, can lead to tissue damage with  
303 serious consequences to the host [41,43]. HCPS is characterized by an exacerbated immune  
304 response that includes a “cytokine storm” that contributes to pathogenesis. In this sense  
305 increased serum levels of proinflammatory cytokines, such as IL-6, IFN- $\gamma$  and TNF- $\alpha$  are  
306 associated with a severe HCPS outcome [20,22,44]. We found that the overexpression of ISGs is  
307 positively correlated with proinflammatory cytokines (IL-6 and TNF- $\alpha$ ) serum levels. This  
308 suggests that increased type I IFN response could be contributing with the increase of  
309 proinflammatory response in the ECMO/fatal HCPS patients. Although these proinflammatory  
310 cytokines were not differentially expressed in severe or ECMO/Fatal patients when compared  
311 with healthy controls, the increased serum levels of these markers could be a contribution from

312 other cell types, such as endothelial cells or macrophages, rather than PBMCs. Thus, the  
313 overregulation of ISGs in PBMCs could be contributing to immunopathology altering  
314 inflammatory pathways in a paracrine way.

315 Our results provide insights into the dynamics of early and late PBMCs immune responses  
316 in HCPS patients and factors associated with ECMO/fatal clinical course. We found that the  
317 overexpression of type I IFN genes are positively correlated with increased viral load in PBMCs  
318 and proinflammatory cytokines and could contribute to immunopathogenesis rather than  
319 restricting viral replication in HCPS patients. Then, hantavirus IFN insensitivity together with  
320 exacerbated proinflammatory response induced by increased IFN response could contribute to  
321 ECMO/fatal HCPS outcome (Fig 6). These results suggest that treatment with interferon could  
322 worsen the HCPS clinical course. Future studies should investigate the damaging effects of type  
323 I IFN response to better understand the immunopathogenesis of HCPS.

324

## 325 **Materials and methods**

326

## 327 **Ethics statement**

328 This study was approved by the ethics committee of each participating institution, Clínica  
329 Alemana Universidad del Desarrollo (UDD) IRB4858, FWA8639, January 2016; Hospital  
330 Clínico UC, IRB2886, FWA4080, July 2016; Hospital Base Valdivia IRB1914 FWA 3412,  
331 January 2017, Hospital Base Osorno IRB1914 FWA 3412, January 2017; Hospital Regional  
332 Puerto Montt, IRB1914, FWA 3412, January 2016, Instituto Nacional del Tórax, April 11 2017.  
333 Enrolled subjects provided written informed consent, their parents, or legal guardians. Clinical  
334 data and stored samples were anonymized to ensure confidentiality.

335

### 336 **Study design**

337 Subjects were recruited in six research centers from central and southern regions of Chile  
338 between March, 2017, and June 2018. Hospitalized subjects with a suspected or confirmed  
339 diagnosis of ANDV infection by serology or RT-qPCR were invited to participate. Exclusion  
340 criteria included patients connected to extracorporeal membrane oxygenation (ECMO) at  
341 enrollment. A total of 24 HCPS patients were enrolled, eight were excluded for these analyses:  
342 one co-infected with Epstein-Barr virus, another one negatively diagnosed for HCPS, patients  
343 with a mild clinical course (not requiring vasoactive drugs or mechanical ventilation) or that did  
344 not complete follow up. A group of healthy subjects (controls) were also enrolled (n=9), and  
345 exclusion criteria included the presence of chronic disease, pregnancy or any signs and  
346 symptoms of an acute infection in the two weeks prior to enrollment. A schematic diagram of  
347 enrolled and analyzed patients is available in S1 Fig. The 12 severe HCPS patients analyzed  
348 were defined as those who develop cardiopulmonary failure and required vasoactive drugs and  
349 mechanical ventilation. Severe HCPS patients were further reclassified as MV+VD (n=5) for  
350 those who received only mechanical ventilation and vasoactive drugs as treatment and  
351 ECMO/Fatal (n=7) for those who also received ECMO as a treatment or died. The subjects were  
352 followed for sixty days post-enrollment. Two blood samples were collected during the acute  
353 phase and one sample in convalescent-phase (at least 60 days after onset of cardiopulmonary  
354 symptoms). A single sample was taken for healthy controls.

355

### 356 **Sample preparation and RNA-seq**

357 The PBMCs were separated by Ficoll-paque (Sigma Aldrich) following the manufacturer's

358 specifications. Aliquots of  $1-3 \times 10^6$  PBMCs/mL were prepared and the RNA was stabilized with  
359 RNeasy Protect Cell Reagent (QIAGEN) and frozen at  $-80^\circ\text{C}$ . The RNA was extracted using the  
360 RNeasy kit (Qiagen) following the manufacturer's specifications. The quality was assessed  
361 using the Agilent 2200 TapeStation. All samples exhibited RNA integrity numbers (RIN) greater  
362 than 6. Aliquots of 350 ng were prepared, stored at  $-80^\circ\text{C}$  and shipped on dry ice to the Broad  
363 Institute (Boston, USA) for RNA sequencing. RNA-seq libraries were prepared with Illumina  
364 Truseq Stranded mRNA chemistry. Libraries were sequenced in multiplex on the Illumina HiSeq  
365 2500 platform in 50M reads in pairs.

366

### 367 **Viral Load and multiplex**

368 For the viral load determination, total nucleic acids were extracted from the buffy coat obtained  
369 from 5mL of peripheral blood using High Pure Viral Nucleic Acid Kit (Roche) following the  
370 manufacturer's specifications. ANDV virus infections were determined by reverse  
371 transcription-polymerase chain reaction (RT-qPCR) using primers from the S segment as  
372 described previously[45] and the number of viral copies per total ng RNA was calculated. The  
373 serum levels of proinflammatory cytokines (IL-6, TNF- $\alpha$ ) were measured using a MILLIPLEX  
374 map (HCYTOMAG-60K, Merck) following the manufacturer's instructions.

375

### 376 **Transcriptome and BTM analysis**

377 A total of 37 samples from 12 HCPS patients (five MV+VD and seven ECMO/Fatal in an early,  
378 late and convalescent-phase) and nine healthy controls were sequenced (S1 Table). Quality  
379 control of the sequenced reads was performed with FastQC. The low-quality sequences (score  
380  $<30$ ) and Illumina adapters were excluded using trimmomatic (v0.38)[46]. Reads were mapped



381 to the human genome reference (hg37) using the STAR (v2.7.0d)[47] alignment tool. Read  
382 counts per gene were quantified against Ensembl (hg37) transcript reference annotations using  
383 featureCounts (v1.6.2)[48]. Analysis was conducted within the Jupyter notebook using IRKernel  
384 (v0.8.15) statistical framework. First, filters to remove samples with less than 10 million aligned  
385 reads were applied. Only one sample of convalescent-phase from Severe type 1 patient did not  
386 meet these quality criteria and was excluded from the analyzes. 36 sequenced samples passed  
387 filter and were included in the following analysis (S1 Table). Second, RNA-Seq read counts were  
388 scaled and normalized by differences in library size between samples using log<sub>2</sub>-counts per  
389 million (log-CPM). Expressed genes were defined as genes with greater than one log-CPM in at  
390 least four samples. Genes that did not meet this parameter were filtered. 16,187 genes passed the  
391 filter. Third, the RNA-Seq read counts were normalized by composition bias which computes  
392 normalization factors for comparing between libraries on a relative scale using the Trimmed  
393 Mean of M-values (TMM) method[49] and log<sub>2</sub> transformed using voom as previously  
394 described[50]. log-CPM and TMM normalizations were performed with edgeR package  
395 (v3.24.3)[51]. To assess the similarities and dissimilarities in global expression profile between  
396 the samples Multi-dimensional scaling (MDS) was performed by limma package (v3.38.9)[52]  
397 and plotted by plotMDS function. Differential expression (DE) was conducted with the  
398 limma-voom analysis workflow as previously described[50] using Benjamini and Hochberg  
399 (BH) correction for multiple testing. DE was performed to compare samples from MV+VD  
400 early, late and convalescent; and ECMO/Fatal early, late, and convalescent versus healthy  
401 controls. Differentially expressed genes (DEGs) were selected based on an adjusted p-value of  
402 0.05 (FDR of 5 %) and exhibiting at least 2 log<sub>2</sub> fold change ( $\log_2FC > 2$ ) a difference in  
403 expression levels. To identify the exclusive DEGs on each condition and those shared throughout

404 all conditions a Venn diagram was made using the VennDiagram (v1.6.20) package. The gene set  
405 enrichment was performed using the clusterProfiler (v3.14.3). Enriched biological processes with  
406 an adjusted p-value of 0.01 were considered statistically significant. The heatmaps were scaled  
407 (log<sub>2</sub>FC median centered) and clusterized by row and graphed by pheatmap package (v. 1.0.12).  
408 Blood transcriptome modules (BTM) enrichment analyses were conducted with tmod (v.a40)[53]  
409 using the tmodLimmaTest function. BTM gene memberships and annotations were obtained  
410 from Li et al[25]. BTMs with an adjusted p-value of 0.01 (FDR of 1 %) were considered  
411 statistically significant.

412

### 413 **Blood immune cell populations**

414 Blood samples (5 ml) were obtained in acid citrate dextrose (ACD) tubes (BD Vacutainer ACD  
415 Solution B; BD, Franklin Lakes, NJ) only on early-acute-phase and processed within 2 to 4 hours  
416 of collection. PBMCs were separated by Ficoll-paque (Sigma Aldrich) and stored at -80°C using  
417 CryoStor CS10 medium (STEM CELL technologies) until use. Thawed PBMCs were stained  
418 with different antibody panels for characterization of NK, T and B cells subpopulations (S5  
419 Table) using BD Biosciences antibodies. PBMCs were rapidly unfrozen and washed with 10%  
420 FBS supplemented PBS, centrifuged at 1200 rpm, and resuspended in PBS-2% FBS. PBMCs  
421 were counted and 2.5-5.0 x 10<sup>5</sup> live PBMCs were used for antibody stainings. Stainings were  
422 performed at room temperature for 15 minutes protected from light. PBMCs viability was  
423 assessed with the Zombie Aqua Fixable Viability Kit (Biolegend® cat. 423102). After that,  
424 unbound antibodies were washed away two times and stained PBMCs were fixed with 200 uL  
425 2% paraformaldehyde. The acquisition was performed in a FACS Canto II flow cytometer (BD  
426 Biosciences) and the data was analyzed with FlowJo v10.0.7.

427

#### 428 **Statistical analysis**

429 RNASeqPower program package (v3.0.1)[54] was used for sample size calculation, which was  
430 developed to estimate the statistical power necessary to identify differentially expressed genes  
431 from RNA-seq experiments. To estimate the sample size, the estimated power of 0.8, the  
432 coefficient of variation of 0.4, and an effect size of 1.75 were used. Considering these  
433 parameters, the number of patients required for differential expression analysis was 9 for each  
434 group. For the analysis of the patient's demographic and clinical characteristics, IBM SPSS  
435 Statistics v.26 was used. Shapiro normality test was applied, and the Mann-Whitney test was  
436 used for comparisons between two non-paired numeric variables and Kruskal-Wallis for three or  
437 more groups without normal distribution, and Chi-square test for qualitative variables. To assess  
438 the correlation between BTM expression and clinical data, the expression median of genes from  
439 BTMs for each patient and Log2FC were calculated. Spearman correlation was performed in the  
440 R program using cor() function and was graphed with gplots (v3.0.1.1).

441 **Acknowledgments:** Thank members of the Hantavirus Study Group in Chile who contributed to  
442 patient enrollment and follow-up, sample collection and data management are as follows:  
443 Catalina Infante, RN, Carolina Henríquez, RN (Departamento de Enfermedades Infecciosas e  
444 Inmunología Pediátricas, Pontificia Universidad Católica de Chile); Flavio Carrión, PhD,  
445 Rodrigo Pérez, BKin (Clínica Alemana de Santiago Universidad del Desarrollo), Pamela Silva,  
446 RN, Angélica Gavilán, MT, Iván Rodríguez, MT, Marina Opazo, MD (Hospital Dr, Guillermo  
447 Grant Benavente Concepción); Carola Osorio, MT, Paulina Miranda, RN, (Hospital Base  
448 Valdivia) María Paz Blanco, RN, Camila Bolados, RN, Catherine Bosnich, MT, Paulina  
449 Cárcamo, MT, Carolina Nuñez, EU (Hospital Puerto Montt Dr. Eduardo Schütz Schroeder);

450 Felipe Vargas, MT, (Hospital Base San José de Osorno);. Thanks Dr. Anne Bliss and Steven  
451 Bradfute, for critical reading of the manuscript, and Dr. David Gorkin for critical review of the  
452 bioinformatic pipeline. Funding: This research was funded by Fondecyt 1161447, Fondecyt  
453 1201240, Redes 180195, Concurso Interno VRID UDD2018, Facultad de Medicina, Clínica  
454 Alemana Universidad del Desarrollo.

455

456 **References:**

- 457 1. Abudurexiti A, Adkins S, Alioto D, Alkhovsky SV, Avšič-Županc T, Ballinger MJ, et al.  
458 Taxonomy of the order Bunyavirales: update 2019. *Arch Virol.* 2019;164: 1949–1965.
- 459 2. Vaheri A, Strandin T, Hepojoki J, Sironen T, Henttonen H, Mäkelä S, et al. Uncovering the  
460 mysteries of hantavirus infections. *Nat Rev Microbiol.* 2013;11: 539–550.
- 461 3. Ferres M, Vial P, Marco C, Yanez L, Godoy P, Castillo C, et al. Prospective evaluation of  
462 household contacts of persons with hantavirus cardiopulmonary syndrome in Chile. *J Infect*  
463 *Dis.* 2007;195: 1563–1571.
- 464 4. Martinez VP, Bellomo C, San Juan J, Pinna D, Forlenza R, Elder M, et al. Person-to-person  
465 transmission of Andes virus. *Emerg Infect Dis.* 2005;11: 1848–1853.
- 466 5. Núñez JJ, Fritz CL, Knust B, Buttke D, Enge B, Novak MG, et al. Hantavirus Infections  
467 among Overnight Visitors to Yosemite National Park, California, USA, 2012. *Emerging*  
468 *Infectious Diseases.* 2014. pp. 386–393. doi:10.3201/eid2003.131581
- 469 6. Vial PA, Valdivieso F, Mertz G, Castillo C, Belmar E, Delgado I, et al. Incubation period of  
470 hantavirus cardiopulmonary syndrome. *Emerg Infect Dis.* 2006;12: 1271–1273.
- 471 7. Manigold T, Vial P. Human hantavirus infections: epidemiology, clinical features,  
472 pathogenesis and immunology. *Swiss Med Wkly.* 2014;144: w13937.
- 473 8. Mertz GJ, Hjelle B, Crowley M, Iwamoto G, Tomacic V, Vial PA. Diagnosis and treatment  
474 of new world hantavirus infections. *Curr Opin Infect Dis.* 2006;19: 437–442.
- 475 9. Riquelme R, Riquelme M, Torres A, Rioseco ML, Vergara JA, Scholz L, et al. Hantavirus  
476 pulmonary syndrome, southern Chile. *Emerg Infect Dis.* 2003;9: 1438–1443.
- 477 10. Mackow ER, Gavrilovskaya IN. Hantavirus regulation of endothelial cell functions.  
478 *Thromb Haemost.* 2009;102: 1030–1041.
- 479 11. Pensiero MN, Sharefkin JB, Dieffenbach CW, Hay J. Hantaan virus infection of human  
480 endothelial cells. *J Virol.* 1992;66: 5929–5936.

- 481 12. Rowe RK, Pekosz A. Bidirectional virus secretion and nonciliated cell tropism following  
482 Andes virus infection of primary airway epithelial cell cultures. *J Virol.* 2006;80:  
483 1087–1097.
- 484 13. Witkowski PT, Bourquain D, Bankov K, Auste B, Dabrowski PW, Nitsche A, et al.  
485 Infection of human airway epithelial cells by different subtypes of Dobrava-Belgrade virus  
486 reveals gene expression patterns corresponding to their virulence potential. *Virology.*  
487 2016;493: 189–201.
- 488 14. Nagai T, Tanishita O, Takahashi Y, Yamanouchi T, Domae K, Kondo K, et al. Isolation of  
489 haemorrhagic fever with renal syndrome virus from leukocytes of rats and virus replication  
490 in cultures of rat and human macrophages. *J Gen Virol.* 1985;66 ( Pt 6): 1271–1278.
- 491 15. Maes P, Clement J, Gavrilovskaya I, Van Ranst M. Hantaviruses: immunology, treatment,  
492 and prevention. *Viral Immunol.* 2004;17: 481–497.
- 493 16. Markotić A, Hensley L, Daddario K, Spik K, Anderson K, Schmaljohn C. Pathogenic  
494 hantaviruses elicit different immunoreactions in THP-1 cells and primary monocytes and  
495 induce differentiation of human monocytes to dendritic-like cells. *Coll Antropol.* 2007;31:  
496 1159–1167.
- 497 17. Raftery MJ, Kraus AA, Ulrich R, Krüger DH, Schönrich G. Hantavirus infection of  
498 dendritic cells. *J Virol.* 2002;76: 10724–10733.
- 499 18. Marsac D, García S, Fournet A, Aguirre A, Pino K, Ferres M, et al. Infection of human  
500 monocyte-derived dendritic cells by ANDES Hantavirus enhances pro-inflammatory state,  
501 the secretion of active MMP-9 and indirectly enhances endothelial permeability. *Virol J.*  
502 2011;8: 223.
- 503 19. Khaiboullina SF, St Jeor SC. Hantavirus immunology. *Viral Immunol.* 2002;15: 609–625.
- 504 20. Bondu V, Schrader R, Gawinowicz MA, McGuire P, Lawrence DA, Hjelle B, et al. Elevated  
505 cytokines, thrombin and PAI-1 in severe HCPS patients due to Sin Nombre virus. *Viruses.*  
506 2015;7: 559–589.
- 507 21. Mori M, Rothman AL, Kurane I, Montoya JM, Nolte KB, Norman JE, et al. High levels of  
508 cytokine-producing cells in the lung tissues of patients with fatal hantavirus pulmonary  
509 syndrome. *J Infect Dis.* 1999;179: 295–302.
- 510 22. Maleki KT, García M, Iglesias A, Alonso D, Ciancaglini M, Hammar U, et al. Serum  
511 Markers Associated with Severity and Outcome of Hantavirus Pulmonary Syndrome. *J*  
512 *Infect Dis.* 2019;219: 1832–1840.
- 513 23. Ribeiro GE, Leon LE, Perez R, Cuiza A, Vial PA, Ferres M, et al. Deletions in Genes  
514 Participating in Innate Immune Response Modify the Clinical Course of Andes  
515 Orthohantavirus Infection. *Viruses.* 2019;11. doi:10.3390/v11080680
- 516 24. López R, Vial C, Graf J, Calvo M, Ferrés M, Mertz G, et al. Platelet Count in Patients with

- 517 Mild Disease at Admission is Associated with Progression to Severe Hantavirus  
518 Cardiopulmonary Syndrome. *Viruses*. 2019;11. doi:10.3390/v11080693
- 519 25. Li S, Roupheal N, Duraisingham S, Romero-Steiner S, Presnell S, Davis C, et al. Molecular  
520 signatures of antibody responses derived from a systems biology study of five human  
521 vaccines. *Nat Immunol*. 2014;15: 195–204.
- 522 26. Chaussabel D, Baldwin N. Democratizing systems immunology with modular  
523 transcriptional repertoire analyses. *Nat Rev Immunol*. 2014;14: 271–280.
- 524 27. Sane J, Laine O, Mäkelä S, Paakkala A, Jarva H, Mustonen J, et al. Complement activation  
525 in Puumala hantavirus infection correlates with disease severity. *Ann Med*. 2012;44:  
526 468–475.
- 527 28. Rasmuson J, Pourazar J, Mohamed N, Lejon K, Evander M, Blomberg A, et al. Cytotoxic  
528 immune responses in the lungs correlate to disease severity in patients with hantavirus  
529 infection. *Eur J Clin Microbiol Infect Dis*. 2016;35: 713–721.
- 530 29. Ennis FA, Cruz J, Spiropoulou CF, Waite D, Peters CJ, Nichol ST, et al. Hantavirus  
531 pulmonary syndrome: CD8+ and CD4+ cytotoxic T lymphocytes to epitopes on Sin  
532 Nombre virus nucleocapsid protein isolated during acute illness. *Virology*. 1997;238:  
533 380–390.
- 534 30. Kilpatrick ED, Terajima M, Koster FT, Catalina MD, Cruz J, Ennis FA. Role of specific  
535 CD8+ T cells in the severity of a fulminant zoonotic viral hemorrhagic fever, hantavirus  
536 pulmonary syndrome. *J Immunol*. 2004;172: 3297–3304.
- 537 31. Lee JS, Park S, Jeong HW, Ahn JY, Choi SJ, Lee H, et al. Immunophenotyping of  
538 COVID-19 and influenza highlights the role of type I interferons in development of severe  
539 COVID-19. *Sci Immunol*. 2020;5. doi:10.1126/sciimmunol.abd1554
- 540 32. Huang Y, Dai H, Ke R. Principles of Effective and Robust Innate Immune Response to Viral  
541 Infections: A Multiplex Network Analysis. *Front Immunol*. 2019;10: 1736.
- 542 33. Ivashkiv LB, Donlin LT. Regulation of type I interferon responses. *Nat Rev Immunol*.  
543 2014;14: 36–49.
- 544 34. Baskin CR, Bielefeldt-Ohmann H, Tumpey TM, Sabourin PJ, Long JP, García-Sastre A, et  
545 al. Early and sustained innate immune response defines pathology and death in nonhuman  
546 primates infected by highly pathogenic influenza virus. *Proc Natl Acad Sci U S A*.  
547 2009;106: 3455–3460.
- 548 35. Yockey LJ, Jurado KA, Arora N, Millet A, Rakib T, Milano KM, et al. Type I interferons  
549 instigate fetal demise after Zika virus infection. *Sci Immunol*. 2018;3.  
550 doi:10.1126/sciimmunol.aao1680
- 551 36. Liu X, Speranza E, Muñoz-Fontela C, Haldenby S, Rickett NY, Garcia-Dorival I, et al.  
552 Transcriptomic signatures differentiate survival from fatal outcomes in humans infected



- 553 with Ebola virus. *Genome Biol.* 2017;18: 4.
- 554 37. Beachboard DC, Horner SM. Innate immune evasion strategies of DNA and RNA viruses.  
555 *Curr Opin Microbiol.* 2016;32: 113–119.
- 556 38. Geimonen E, Neff S, Raymond T, Kocer SS, Gavrilovskaya IN, Mackow ER. Pathogenic  
557 and nonpathogenic hantaviruses differentially regulate endothelial cell responses. *Proc Natl*  
558 *Acad Sci U S A.* 2002;99: 13837–13842.
- 559 39. Matthys V, Mackow ER. Hantavirus regulation of type I interferon responses. *Adv Virol.*  
560 2012;2012: 524024.
- 561 40. Tamura M, Asada H, Kondo K, Takahashi M, Yamanishi K. Effects of human and murine  
562 interferons against hemorrhagic fever with renal syndrome (HFRS) virus (Hantaan virus).  
563 *Antiviral Res.* 1987;8: 171–178.
- 564 41. Goritzka M, Durant LR, Pereira C, Salek-Ardakani S, Openshaw PJM, Johansson C.  
565 Alpha/beta interferon receptor signaling amplifies early proinflammatory cytokine  
566 production in the lung during respiratory syncytial virus infection. *J Virol.* 2014;88:  
567 6128–6136.
- 568 42. Davidson S, Maini MK, Wack A. Disease-promoting effects of type I interferons in viral,  
569 bacterial, and coinfections. *J Interferon Cytokine Res.* 2015;35: 252–264.
- 570 43. Davidson S, Crotta S, McCabe TM, Wack A. Pathogenic potential of interferon  $\alpha\beta$  in acute  
571 influenza infection. *Nat Commun.* 2014;5: 3864.
- 572 44. Angulo J, Martínez-Valdebenito C, Marco C, Galeno H, Villagra E, Vera L, et al. Serum  
573 levels of interleukin-6 are linked to the severity of the disease caused by Andes Virus. *PLoS*  
574 *Negl Trop Dis.* 2017;11: e0005757.
- 575 45. Vial C, Martinez-Valdebenito C, Rios S, Martinez J, Vial PA, Ferres M, et al. Molecular  
576 method for the detection of Andes hantavirus infection: validation for clinical diagnostics.  
577 *Diagn Microbiol Infect Dis.* 2016;84: 36–39.
- 578 46. Bolger AM, Lohse M, Usadel B. Trimmomatic: a flexible trimmer for Illumina sequence  
579 data. *Bioinformatics.* 2014;30: 2114–2120.
- 580 47. Dobin A, Davis CA, Schlesinger F, Drenkow J, Zaleski C, Jha S, et al. STAR: ultrafast  
581 universal RNA-seq aligner. *Bioinformatics.* 2013;29: 15–21.
- 582 48. Liao Y, Smyth GK, Shi W. featureCounts: an efficient general purpose program for  
583 assigning sequence reads to genomic features. *Bioinformatics.* 2014;30: 923–930.
- 584 49. Robinson MD, Oshlack A. A scaling normalization method for differential expression  
585 analysis of RNA-seq data. *Genome Biol.* 2010;11: R25.
- 586 50. Law CW, Alhamdoosh M, Su S, Dong X, Tian L, Smyth GK, et al. RNA-seq analysis is

- 587 easy as 1-2-3 with limma, Glimma and edgeR. F1000Res. 2016;5.  
588 doi:10.12688/f1000research.9005.3
- 589 51. Robinson MD, McCarthy DJ, Smyth GK. edgeR: a Bioconductor package for differential  
590 expression analysis of digital gene expression data. Bioinformatics. 2010;26: 139–140.
- 591 52. Ritchie ME, Phipson B, Wu D, Hu Y, Law CW, Shi W, et al. limma powers differential  
592 expression analyses for RNA-sequencing and microarray studies. Nucleic Acids Res.  
593 2015;43: e47.
- 594 53. Weiner J 3rd, Domaszewska T. tmod: an R package for general and multivariate enrichment  
595 analysis. PeerJ Preprints. 2016;4. Available:  
596 [https://pure.mpg.de/rest/items/item\\_2404004/component/file\\_2404003/content](https://pure.mpg.de/rest/items/item_2404004/component/file_2404003/content)
- 597 54. Hart SN, Therneau TM, Zhang Y, Poland GA, Kocher J-P. Calculating sample size  
598 estimates for RNA sequencing data. J Comput Biol. 2013;20: 970–978.

599

600

#### 601 **Supporting Information captions**

602

603 **S1 Fig. Schematic overview of enrolled and analyzed individuals for this study.**

604

605 **S1 Table. Number of sequenced samples of HCPS patients and Healthy controls.**

606

607

608 **S2 Table. Significant DEGs belonging to marked BTMs from text Fig 3**

609

610 **S3 Table. Gene enrichment analysis: Biological processes and enriched genes in**  
611 **ECMO/Fatal group of patients in early-acute-response, from Fig 4B**

612

613 **S4 Table. Correlations between transcriptional profile enriched in ECMO/Fatal patients in**  
614 **an early acute response and clinical data.**

615

616 **S5 Table. Cell surface markers used to define WBC populations by flow cytometry**  
617 **immunophenotyping.**

618

619 **Data reporting:** FastQ files from transcriptomic analysis are available at PRJNA660433. Any  
620 metadata needed must be obtained through an MTA with the authors.

621 **Financial Disclosure Statement:** This research was funded by Agencia Nacional de  
622 Investigación y Desarrollo (ANID) Projects Fondecyt 1161447, Fondecyt 1201240, Redes  
623 180195; Concurso Interno VRID UDD2018, Universidad del Desarrollo.



624 **Competing interests:** The authors declare no conflict of interest.

625

626 **Related manuscripts:** The authors declare there is not a duplicated or related manuscript under  
627 consideration or accepted for publication elsewhere.

628 **Author contributions:** Conceptualization C.V., P.V. and G.E.; methodology C.V., L.L. and GE;  
629 patient enrollment M.F., N.LC., C.M-V., L.F, M.L.R, J.G., F.A., J.G.,R.L.,J.L.P; formal analysis,  
630 G.E. and L.L.; investigation, R.P., E.D.,C.M-V, P.V., A.C.; resources, P.V. and C.V.; data  
631 curation, A.C.; writing original draft preparation, G.E, C.V. and L.L., writing review and editing,  
632 N.LC., M.C., G.M. and P.V.; project administration, R.P.; funding acquisition, G.M., P.V. and  
633 C.V.

634

635

636

Table 1. Demographics, clinical and blood cells immunophenotypes of HCPS patients and healthy controls.

|                                                             | HCPS – Severe Patients    |                             | Healthy Controls             | P value            |
|-------------------------------------------------------------|---------------------------|-----------------------------|------------------------------|--------------------|
|                                                             | MV+VD                     | ECMO/Fatal                  |                              |                    |
| No. of patients                                             | 5                         | 7                           | 9                            |                    |
| Age (years),<br>Median (25 to 75%<br>IQR)                   | 22 (10.0-26.50)           | 34 (15-36)                  | 25 (17.0-40.50)              | 0.501 <sup>a</sup> |
| Gender, n (%)                                               |                           |                             |                              |                    |
| Male                                                        | 5 (100)                   | 4 (44.4)                    | 5 (55.6)                     | 0.193 <sup>b</sup> |
| Female                                                      | 0                         | 3 (37.5)                    | 4 (44.4)                     |                    |
| Ethnicity, n (%)                                            |                           |                             |                              |                    |
| European                                                    | 4 (80)                    | 5 (71.4)                    | 8 (88.9)                     | 0.676 <sup>b</sup> |
| Amerindian                                                  | 1 (20)                    | 2 (28.6)                    | 1 (11.1)                     |                    |
| Days of prodromal<br>symptoms,<br>Median (25 to 75%<br>IQR) | 6 (4.5-7.0)               | 6 (5.0-7.0)                 | NA                           | 1.000 <sup>c</sup> |
| Days of Oxygen<br>requirement                               | 6 (2.0-7.5)               | 10 (4.0-19.0)               | NA                           | 0.149 <sup>c</sup> |
| Days of VD duration                                         | 3 (2.0-3.5)               | 7 (1.0-9.0)                 | NA                           | 0.202 <sup>c</sup> |
| Days of MV duration                                         | 4 (3.0-5.5)               | 9 (4.0-16.0)                | NA                           | 0.106 <sup>c</sup> |
| Days of ECMO                                                | 0                         | 4 (0-6.0)                   | NA                           | 0.048 <sup>c</sup> |
| Days of Hospitalization                                     | 13 (9.5-21.5)             | 19 (4.0-59.0)               | NA                           | 0.876 <sup>c</sup> |
| <b>Laboratory exams<sup>d</sup></b>                         |                           |                             |                              |                    |
| ANDV Viral Load<br>(copies/ng RNA)                          | 319.50<br>(82-557)        | 616<br>(285.5-3368.25)      | NA                           | 0.286 <sup>c</sup> |
| Platelets (cells/mm <sup>3</sup> )                          | 44500<br>(33250-51250)    | 79000<br>(47750-154500)     | 236000<br>(201500-253000)    | 0.002 <sup>a</sup> |
| Leukocytes (cells/mm <sup>3</sup> )                         | 14900<br>(10000-22300)    | 10850<br>(7175-15425)       | 6400<br>(5725-7575)          | 0.085 <sup>a</sup> |
| Neutrophils %                                               | 51 (47-60.47)             | 63.8 (37.03-81)             | 53 (51-61)                   | 0.732 <sup>a</sup> |
| <b>Blood cell immunophenotype*</b>                          |                           |                             |                              |                    |
| <b>T cell panel<br/>(cells/mm<sup>3</sup>)</b>              |                           |                             |                              |                    |
| CD3+ cells                                                  | 734.97<br>(568.2-2384.37) | 1216.39<br>(443.99-3390.33) | 1234.33<br>(1018.27-1575.23) | 0.866 <sup>a</sup> |
| CD4+ T helper cells                                         | 130.08<br>(114.87-419.53) | 481.82<br>(197.12-1920.69)  | 926.42<br>(692.69-1308.09)   | 0.90 <sup>a</sup>  |
| CD8+ cytotoxic T cells                                      | 633.95<br>(452.5-1977.55) | 736.34<br>(246.51-1194.27)  | 302.99<br>(262.94-336.84)    | 0.297 <sup>a</sup> |
| <b>NK cell panel<br/>(cells/mm<sup>3</sup>)</b>             |                           |                             |                              |                    |
| CD56+ NK cells                                              | 83.85<br>(60.01-199.09)   | 462.45<br>(110.19-1243.82)  | 290.96<br>(191.72-763.20)    | 0.258 <sup>a</sup> |

|                                                |                          |                         |                           |                    |
|------------------------------------------------|--------------------------|-------------------------|---------------------------|--------------------|
| CD3- CD56+<br>NK Bright cells                  | 2.26<br>(1.62-8.40)      | 45.97<br>(7.73-132.95)  | 17.52<br>(10.11-24.23)    | 0.098 <sup>a</sup> |
| CD3+ CD56+<br>NKT cells                        | 67.39<br>(37.92-82.22)   | 96.73<br>(19.76-117.53) | 42.62<br>(30.10-141.45)   | 0.753 <sup>c</sup> |
| <b>B cell panel<br/>(cells/mm<sup>3</sup>)</b> |                          |                         |                           |                    |
| CD19+ LB cells                                 | 122.85<br>(94.18-411.87) | 169<br>(84.29-731.69)   | 364.27<br>(211.37-421.74) | 0.508 <sup>c</sup> |

Abbreviations: HCPS, hantavirus cardiopulmonary syndrome; NA, not applicable; VD, vasoactive drugs; MV, mechanical ventilation; ECMO, extracorporeal membrane oxygenation; LOS, length of stay; n, number; LB, B lymphocytes. \*Data shown represent the median (25 to 75% IQR) of the first sample from 12 HCPS, 5 VM+VD, 7 ECMO/Fatal and 9 Healthy controls; <sup>a</sup>Kruskal-Wallis test and <sup>b</sup>Chi-square test were used for comparisons between VM+VD, ECMO/Fatal, and healthy controls; <sup>c</sup>Mann-Whitney test was used for comparisons between VM+VD and ECMO/Fatal. <sup>d</sup>Data shown represents the median (25 to 75% IQR) of the first sample of each patient (Day 0-2/Early acute).

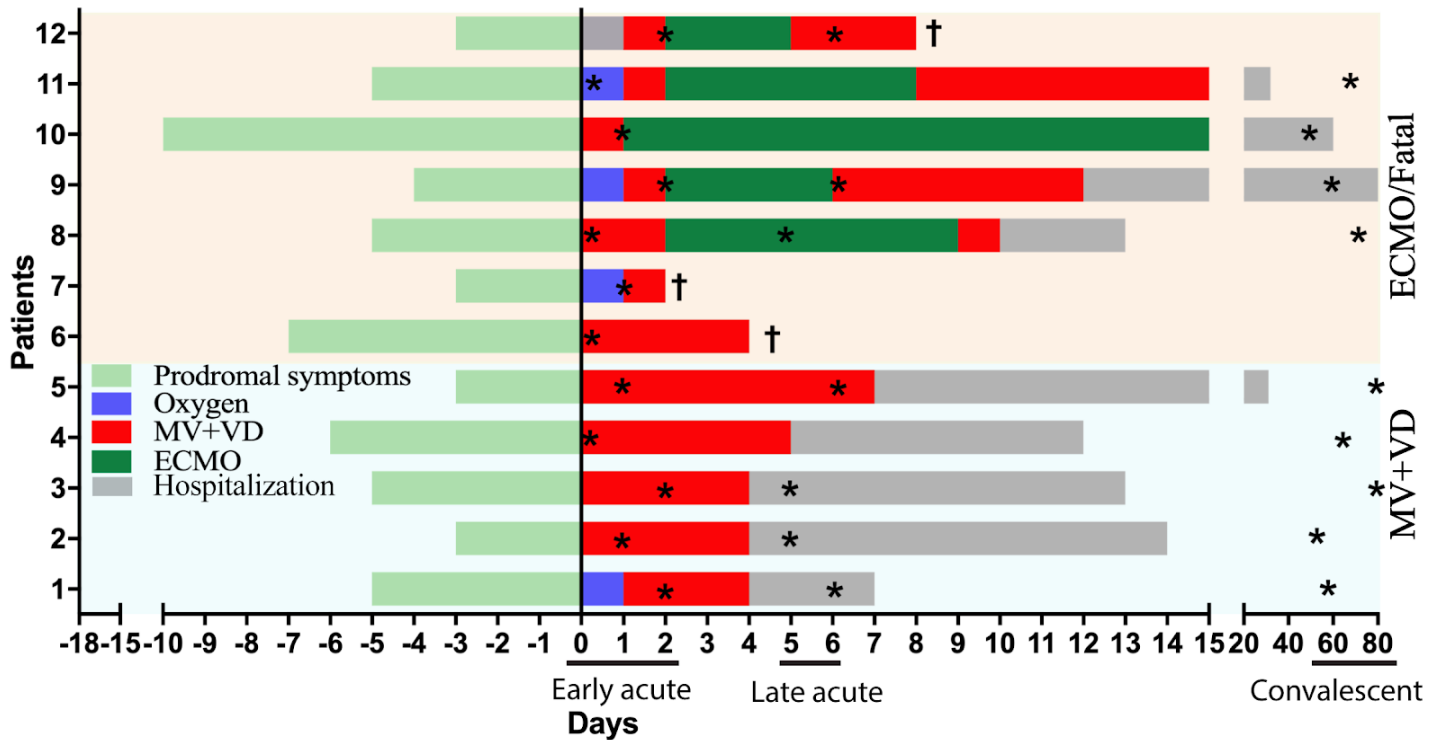

**Fig. 1. Clinical course of severe HCPS patients.** Y axis is patient ID, X axis are the days of evolution, with a highlight on disease timeline: early-acute, late-acute or convalescent phase. Light green bars are the days of onset of nonspecific symptoms. Day 0 represents onset of cardiopulmonary symptoms. Blue bars represent the days when patients required supplementary oxygen. Red bars represent days when patients developed HCPS, requiring vasoactive drugs and mechanical ventilation as treatment. Dark green bars represent patients requiring ECMO. Patients that required ECMO or died were sub-categorize to the ECMO/Fatal group. Less severe patients that required vasoactive drugs and mechanical ventilation were sub-categorize to VM+VD patients. Grey bars are the hospitalization days to recover. \*samples taken, † patients who died. VD, vasoactive drugs; MV, mechanical ventilation; ECMO, extracorporeal membrane oxygenation.

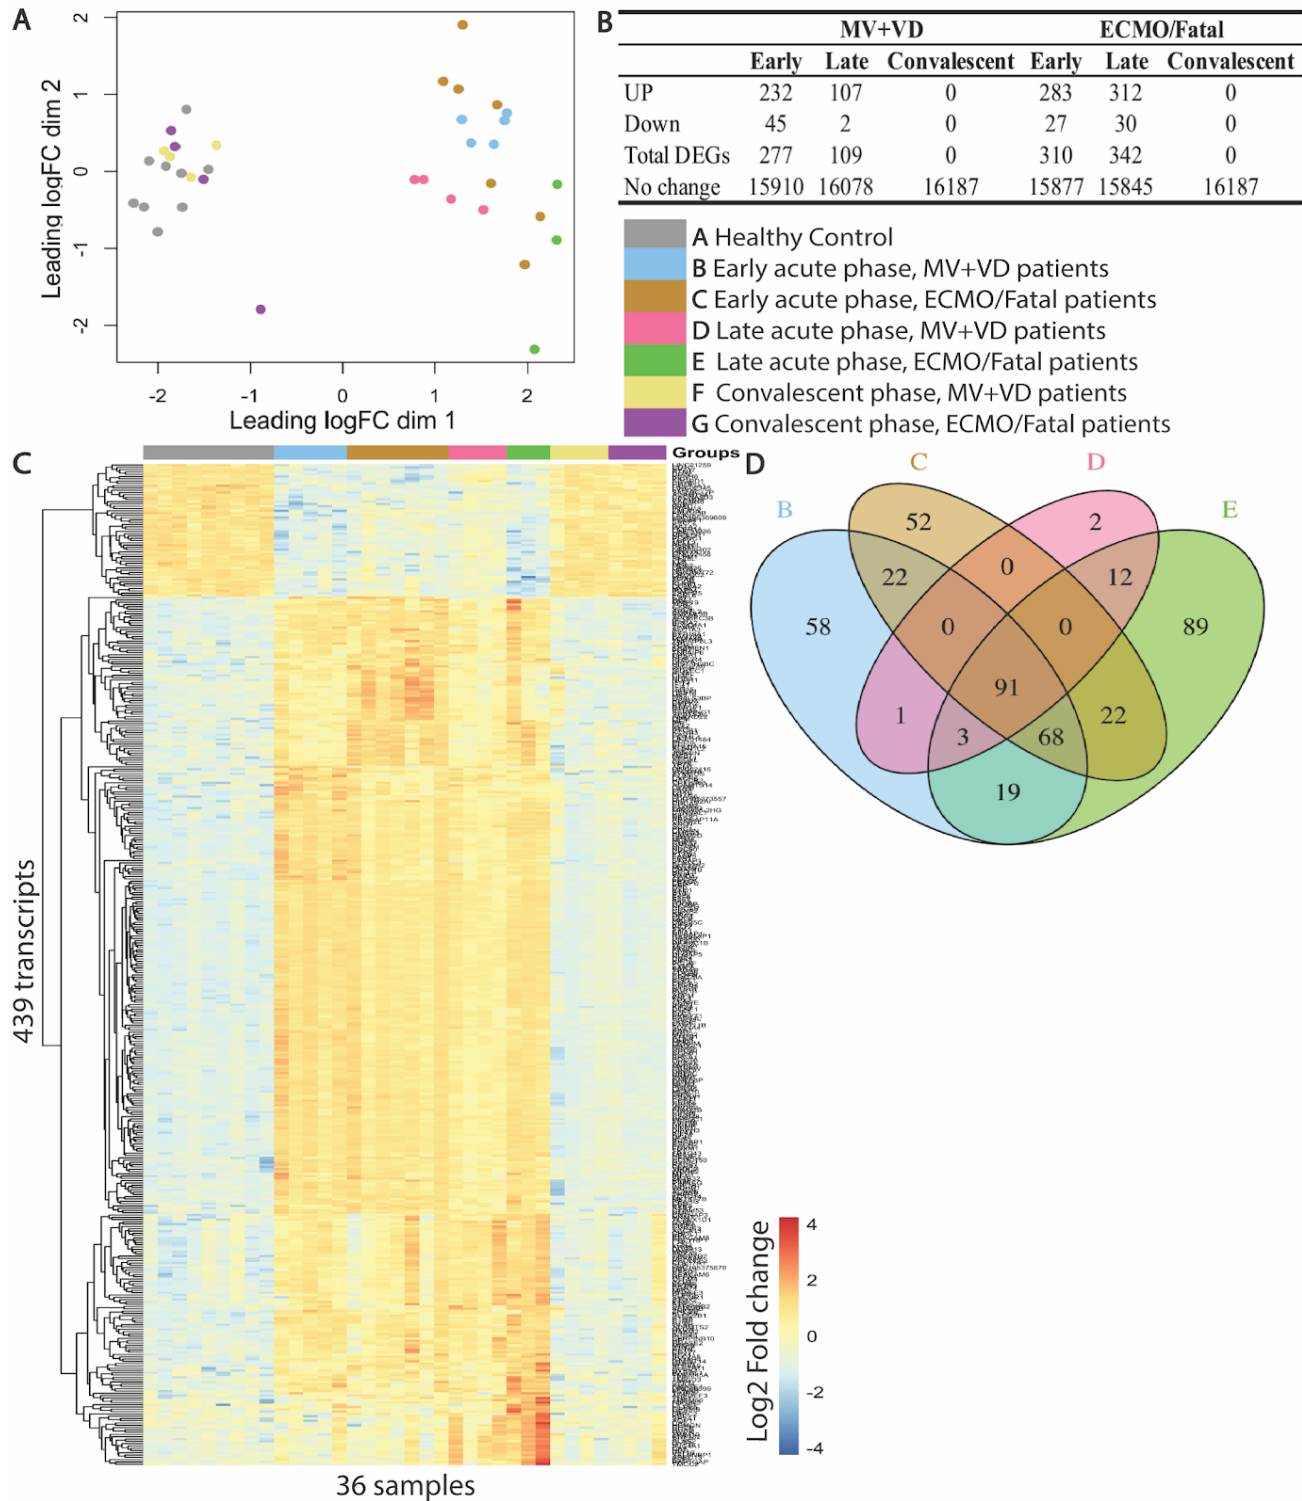

**Fig. 2. Transcriptional PBMC signature of HCPS patients by severity.** (A) HCPS patients and healthy controls were divided in seven study groups from A to G (study groups inside figure legend). Transcriptional profile was graphed as a multidimensional scaling (MDS) plot, where X and Y axis represents the variability in global expression profile of the samples and each dot is a patient with the corresponding colour of the study group. (B) Number of differentially expressed genes (DEGs) between MV+VD and ECMO/Fatal HCPS patients in an early-late-convalescent phase versus healthy controls with adjusted p-value of 0.05 (FDR of 5 %) and exhibiting at least 2 log<sub>2</sub> fold change (log<sub>2</sub>FC > 2) difference in expression levels. DEGs were obtained by comparing each study group of HCPS patients with the healthy control group. (C) Transcriptional signatures of DEGs of healthy controls, MV+VD and ECMO/Fatal HCPS patients in an early and late-acute and convalescent phase. Data are displayed in a heatmap format, where each column represents a patient and each row represents the expression value (log<sub>2</sub>FC median centered) of each gene between all samples. Red indicates overexpression, blue indicates underexpression, and yellow indicates no difference in expression between samples. The total of DEGs between groups were plotted in the heatmap (439 transcripts). (D) The Venn diagram shows the number of shared and unique DEGs between MV+VD and ECMO/Fatal patients in an early and late-acute-phase versus healthy controls.

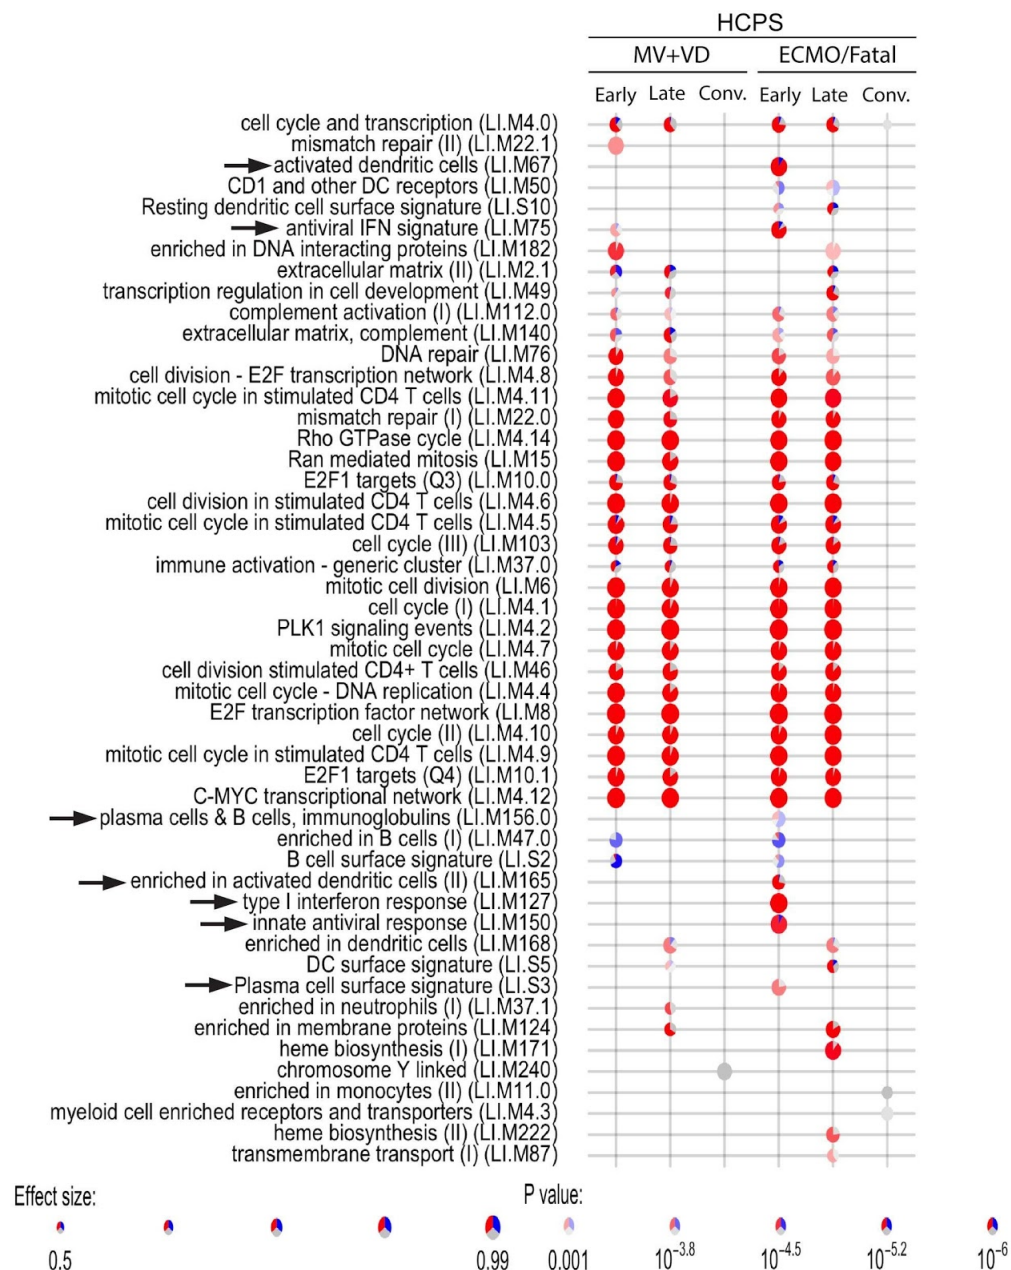

**Fig. 3. Dynamics of VM+VD and ECMO/Fatal HCPS patient's response in PBMCs.** BTM dot plot of differentially enriched BTMs in VM+VD and ECMO/Fatal HCPS patients, in early-late-convalescent-phases were compared with healthy controls. Y axis has the name and code of each BTM module, and X axis each study group. Activation of modules was tested using the FDR-ranked lists of genes generated by limma and applying the tmod test. Each comparison is in the intersection of lines of the X and Y axis. When a module is statistically significant ( $p\text{-value} \leq 0.001$ ) it is represented by a pie chart in the intersection in which the proportion of significantly upregulated genes are shown in red and downregulated in blue. The grey portion of the pie represents genes that were not significantly differentially regulated. The effect size (enrichment) is proportional to its size which means that the larger the size of the pie, the greater the module enrichment. The significance of module activation ( $p\text{-value}$ ) is proportional to the intensity of the color pie, which means that the greater the color intensity (stronger the red or blue color), the lower the  $p\text{-value}$  and the greater the significance. Modules that were not statistically significant, were not plotted and are seen as the line cross of X and Y axis.



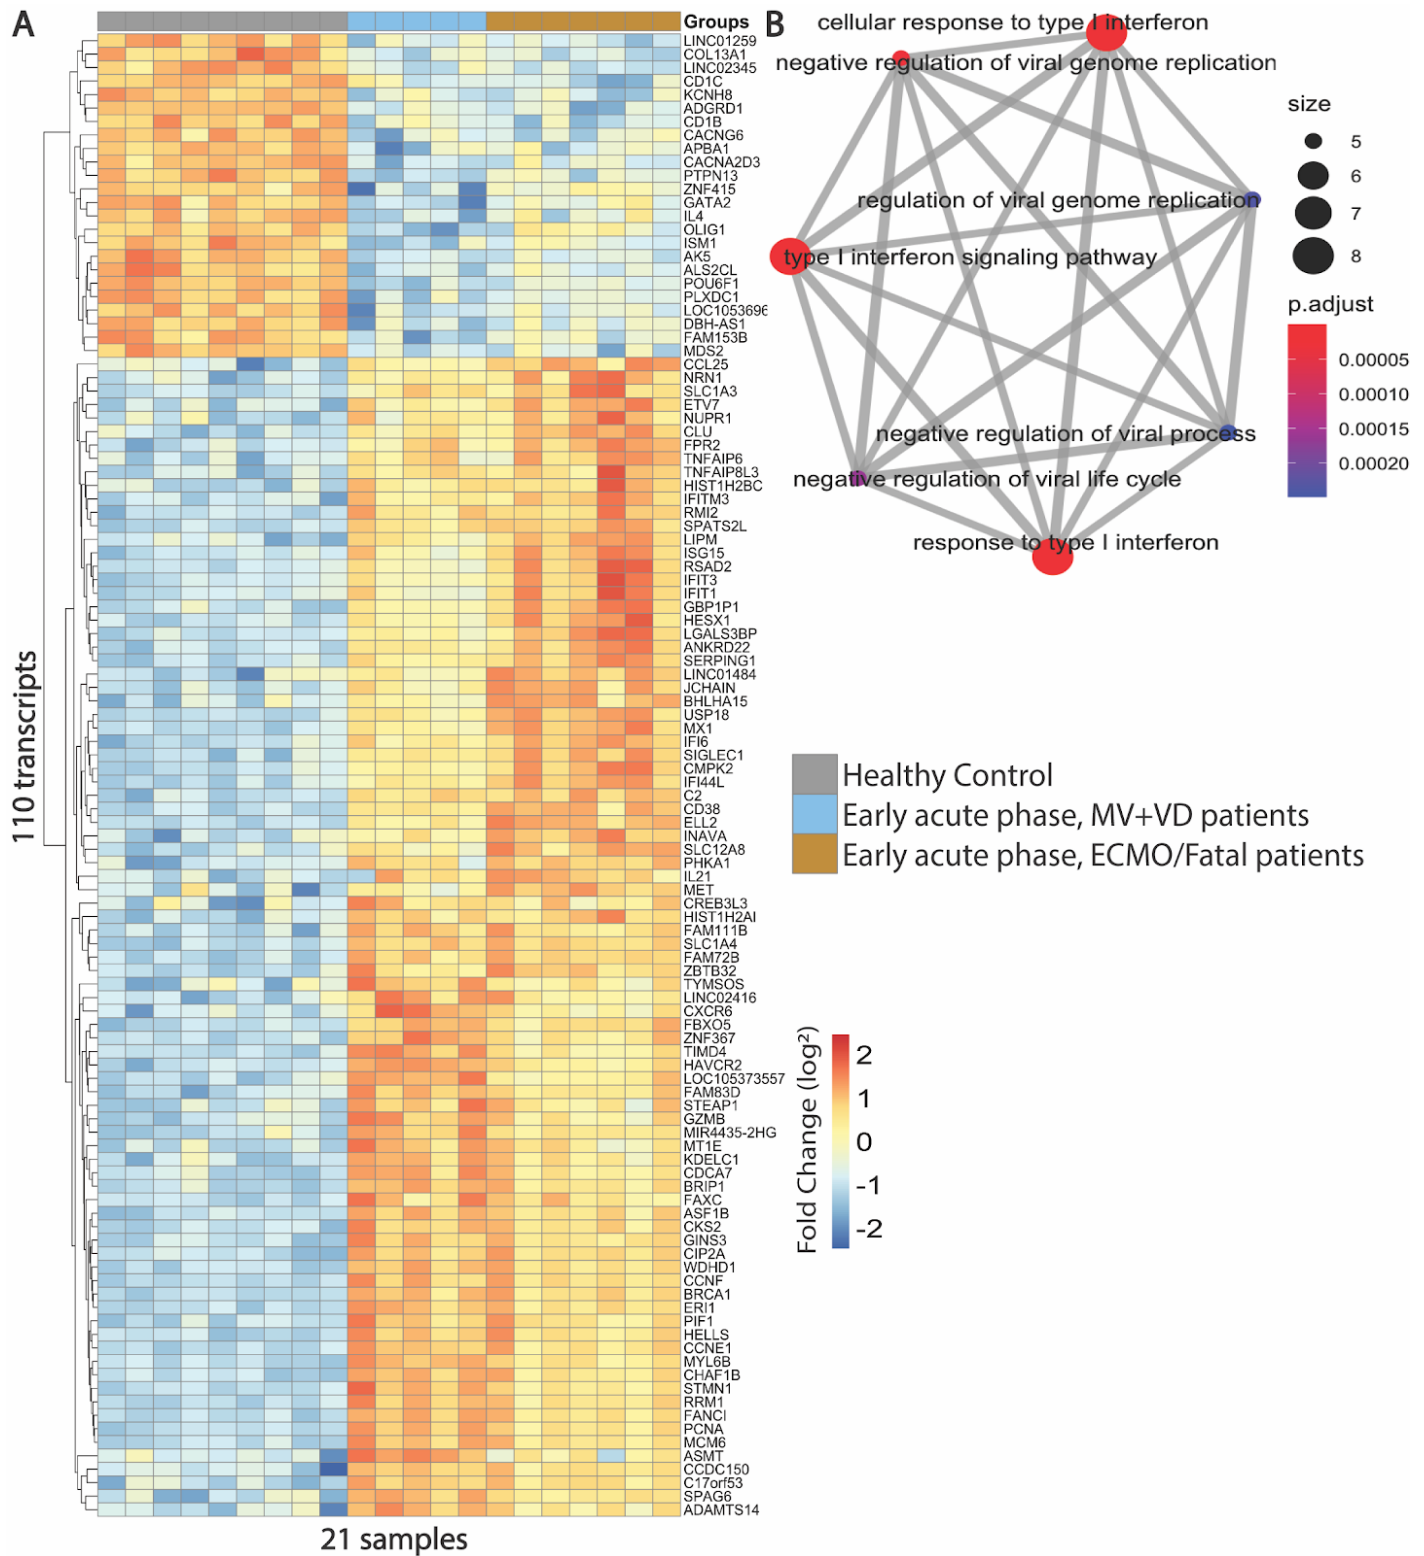

**Fig. 4. Transcriptional profile of DEGs in VM+VD and ECMO/Fatal patients in an early-acute phase. (A).** A total of 110 transcripts are displayed in a heatmap format, where each column represents the gene expression of a patient (five VM+VD, seven ECMO/Fatal and nine healthy controls); Each row represents expression value (log<sub>2</sub>FC median centered) for each gene between all samples. First row corresponds to the colour of the study group (legend inside the figure). Red indicates overexpression, blue indicates underexpression, and yellow indicates no difference in expression between samples. **(B)** Results of biological processes enriched in ECMO/Fatal patients. Gene set enrichment analysis was performed for the 52 exclusive DEG in ECMO/Fatal patients in an early-acute-phase. Node size correlates with gene set size and edge widths indicate the number of shared genes. Red and blue color indicate more and less enrichment significance respectively.

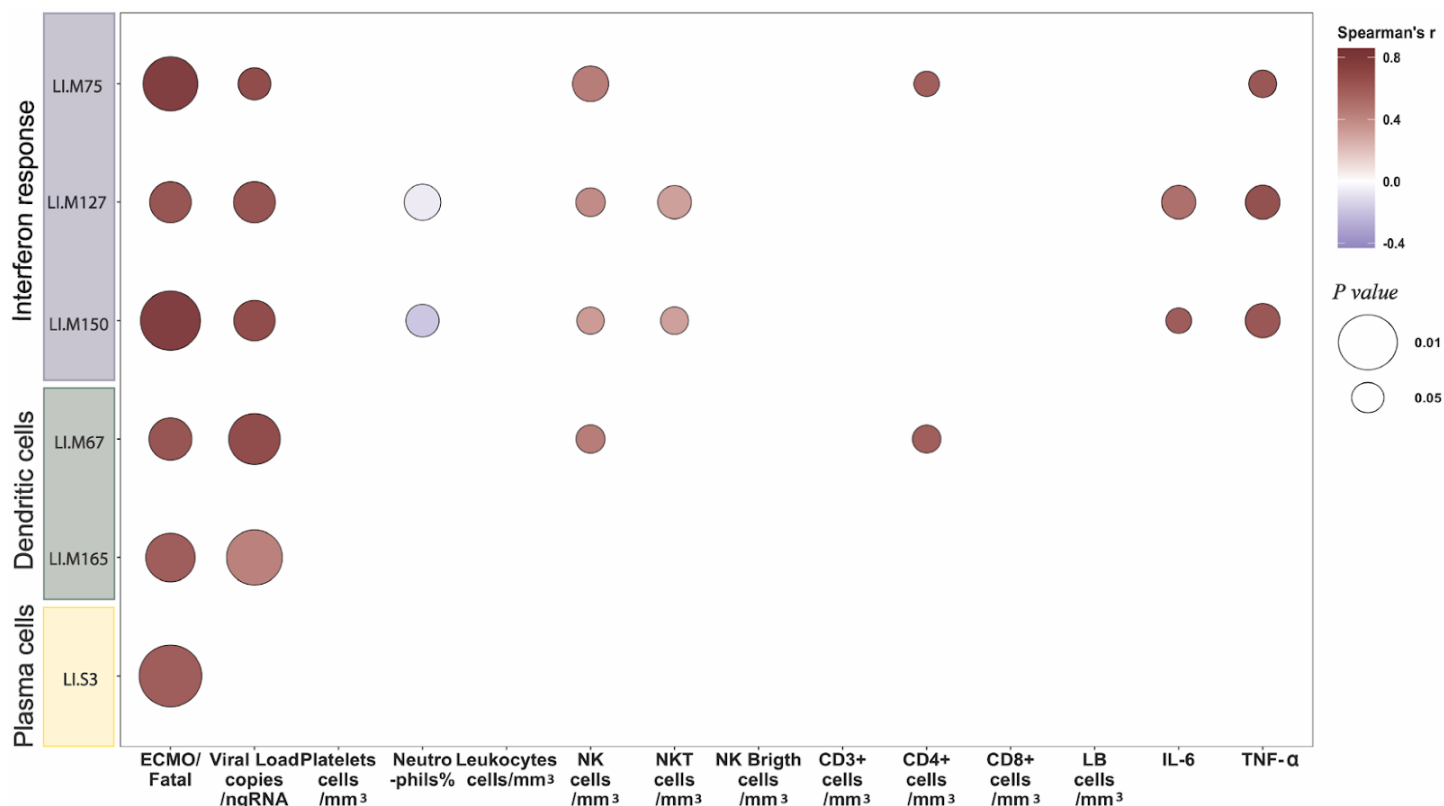

**Fig. 5. Correlations between transcriptional profile enriched in ECMO/Fatal patients in an early acute response and clinical laboratory data.** X axis has clinical, laboratory data and immune profile information Y axis has the code of analyzed BTMs and to which biological process it belongs. Spearman correlation between expression median of genes over- or underexpressed per BTM data and clinical/lab/immune information was performed for VM+VD and ECMO/Fatal patients. The dot in the intersection of X and Y axis shows the correlation, if no dot is present there's no correlation. The intensity of the color in the dot indicates the strength of the Spearman's correlation coefficient (red positive correlation and blue negative correlation), and the dot size indicates the significance of the *P-value*. CD3, CD3+ cells; CD4+, T helper cells; CD8+, cytotoxic T cells; LB, B cells; LI.M75, antiviral interferon signature; LI.M127, type I interferon response; LI.M150, innate antiviral response; LI.M67, activated dendritic cells; LI.M165, enriched in activated dendritic cells; LI.S3, plasma cells surface signature.



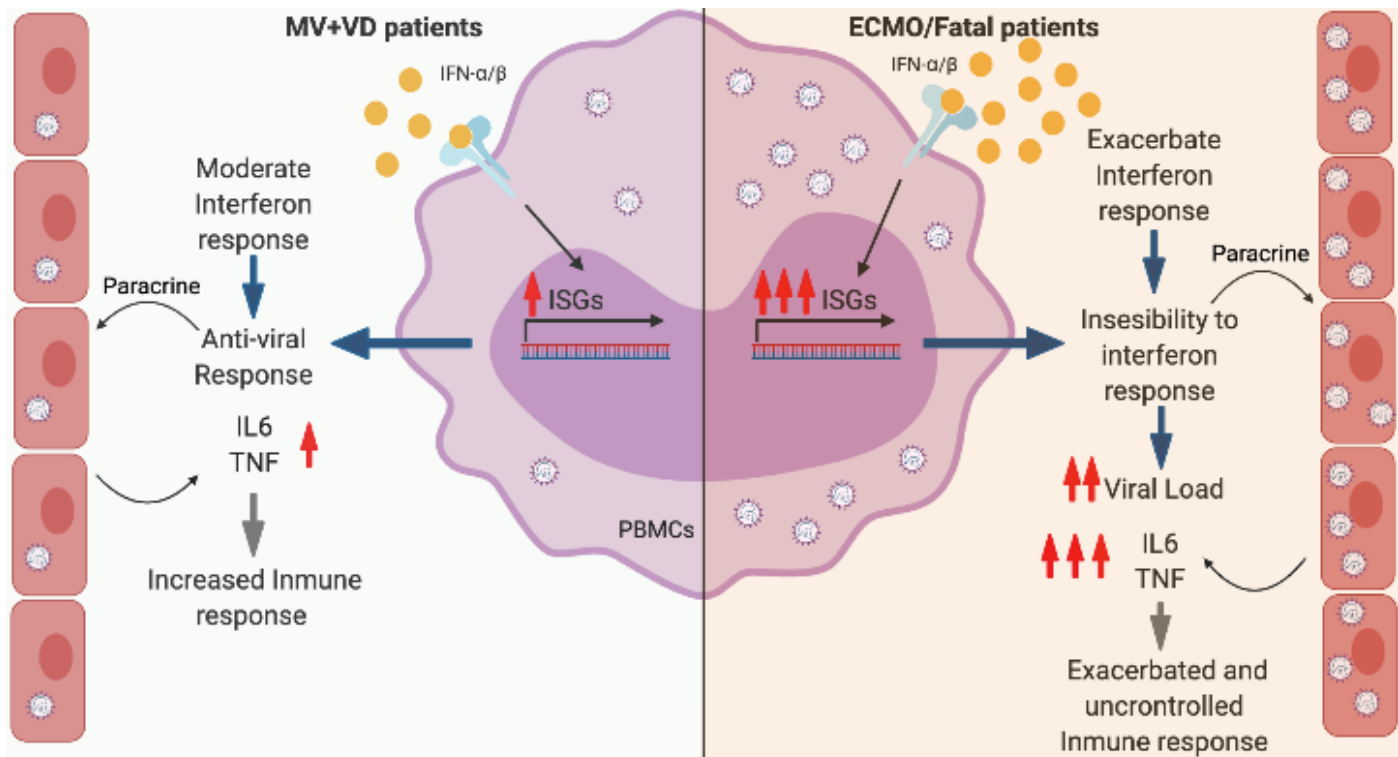

**Fig. 6. Increased type I IFN is a hallmark of disease severity in HCPS patients.** After infection is established in an early-acute-phase, type I IFN response is expressively activated and insensitivity to IFN can happen in the more severe patients that are treated with ECMO or die. Also, other cells such as endothelial cells produce high levels of proinflammatory cytokines that contribute to exacerbated immune response in more severe patients. Less severe patients present a moderate interferon response which leads to an antiviral and controlled immune response. Created with Biorender.
