# Supplementary material for: Transcriptomic signature on Hantavirus Cardiopulmonary Syndrome patients, reveals an increased interferon response as a hallmark of critically ill patients
Source: bioRxiv or medRxiv preprint supplement (doi:10.1101/2021.07.28.21260540), 2021-07-31
Supplement: Supplementary file [file media-1.pdf]

## SUPPLEMENTARY INFORMATION:

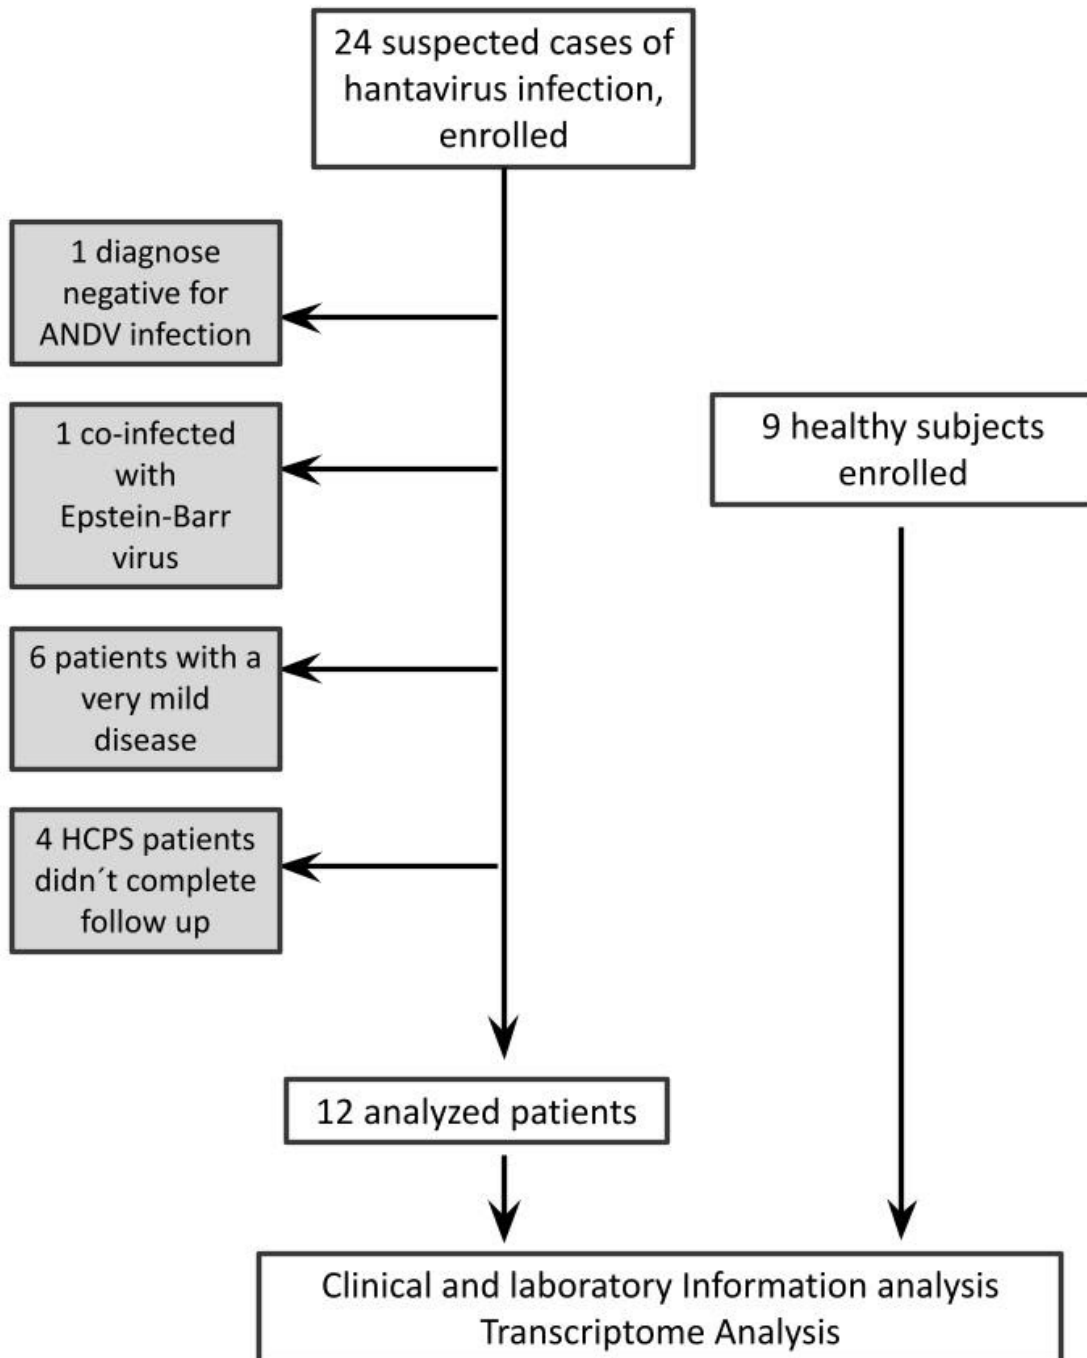

S1 Fig. Schematic overview of enrolled and analyzed individuals for this study.

**Supplementary Table 1.** Number of sequenced samples of HCPS patients and Healthy controls.

|                     | MV+VD<br>(n=5) | ECMO/Fatal<br>(n=7) | Healthy Controls<br>(n=9) |
|---------------------|----------------|---------------------|---------------------------|
| <b>Early</b>        | 5              | 7                   | 9                         |
| <b>Late</b>         | 4              | 3                   | 0                         |
| <b>Convalescent</b> | 4              | 4                   | 0                         |
| <b>Total</b>        | 13             | 14                  | 9                         |

**Supplementary Table 2.** Significant DEGs belonging to marked BTMs from text Figure 3

|                                               |                                   | Gene SYMBOL | MV+VD           |              |                 |              |                 |            | ECMO/Fatal      |              |                 |              |                 |            |
|-----------------------------------------------|-----------------------------------|-------------|-----------------|--------------|-----------------|--------------|-----------------|------------|-----------------|--------------|-----------------|--------------|-----------------|------------|
|                                               |                                   |             | Early           |              | Late            |              | Convalescent    |            | Early           |              | Late            |              | Convalescent    |            |
|                                               |                                   |             | log Fold Change | adj. P.Val   | log Fold Change | adj. P.Val   | log Fold Change | adj. P.Val | log Fold Change | adj. P. Val  | log Fold Change | adj. P. Val  | log Fold Change | adj.P. Val |
| <b>Interferon Response</b>                    | Antiviral IFN signature LI.M75    | SERPING1    | 3.570           | 0.197        | 2.996           | 1            | 0.307           | 1          | 5.106           | <b>0.000</b> | 3.235           | 0.733        | -0.282          | 1          |
|                                               |                                   | RSAD2       | 1.950           | 1            | 1.502           | 1            | 0.311           | 1          | 4.458           | <b>0.000</b> | 2.438           | 1            | -0.373          | 1          |
|                                               |                                   | FCER1A      | -6.143          | <b>0.000</b> | -3.377          | 0.289        | -0.659          | 1          | -4.353          | <b>0.000</b> | -6.243          | <b>0.001</b> | -0.989          | 1          |
|                                               |                                   | C1QB        | 5.868           | <b>0.000</b> | 4.496           | <b>0.035</b> | 0.735           | 1          | 4.688           | <b>0.002</b> | 6.453           | <b>0.000</b> | 0.403           | 1          |
|                                               |                                   | IFIT1       | 1.698           | 1            | 1.516           | 1            | 0.156           | 1          | 4.164           | <b>0.015</b> | 1.493           | 1            | -0.504          | 1          |
|                                               |                                   | ANXA3       | 5.806           | <b>0.018</b> | 6.250           | <b>0.021</b> | 0.521           | 1          | 5.169           | 0.052        | 7.201           | <b>0.002</b> | 0.916           | 1          |
|                                               | Type I IFN response LI.M127       | USP18       | 2.684           | 1            | 1.451           | 1            | 0.426           | 1          | 4.006           | <b>0.000</b> | 1.768           | 1            | 0.134           | 1          |
|                                               |                                   | RSAD2       | 1.950           | 1            | 1.502           | 1            | 0.311           | 1          | 4.458           | <b>0.000</b> | 2.438           | 1            | -0.373          | 1          |
|                                               |                                   | IFIT1       | 1.698           | 1            | 1.516           | 1            | 0.156           | 1          | 4.164           | <b>0.015</b> | 1.493           | 1            | -0.504          | 1          |
|                                               | Innate antiviral response LI.M150 | RSAD2       | 1.950           | 1            | 1.502           | 1            | 0.311           | 1          | 4.458           | <b>0.000</b> | 2.438           | 1            | -0.373          | 1          |
|                                               |                                   | IFIT1       | 1.698           | 1            | 1.516           | 1            | 0.156           | 1          | 4.164           | <b>0.015</b> | 1.493           | 1            | -0.504          | 1          |
|                                               |                                   | OAS3        | 1.365           | 1            | 1.076           | 1            | 0.325           | 1          | 3.012           | 0.087        | 1.032           | 1            | -0.194          | 1          |
|                                               | OASL                              | OASL        | 2.579           | 1            | 2.419           | 1            | 0.425           | 1          | 3.273           | 0.097        | 1.898           | 1            | 0.172           | 1          |
|                                               |                                   | CD38        | 2.692           | 0.297        | 2.238           | 1            | 0.147           | 1          | 3.536           | <b>0.000</b> | 2.767           | 0.311        | 0.696           | 1          |
|                                               |                                   | SERPING1    | 3.570           | 0.197        | 2.996           | 1            | 0.307           | 1          | 5.106           | <b>0.000</b> | 3.235           | 0.733        | -0.282          | 1          |
|                                               | Activated dendritic cells LI.M67  | RSAD2       | 1.950           | 1            | 1.502           | 1            | 0.311           | 1          | 4.458           | <b>0.000</b> | 2.438           | 1            | -0.373          | 1          |
|                                               |                                   | C1QC        | 6.608           | <b>0.000</b> | 5.569           | <b>0.013</b> | 0.794           | 1          | 5.569           | <b>0.002</b> | 7.303           | <b>0.000</b> | 0.414           | 1          |
|                                               |                                   | C2          | 2.858           | 0.228        | 2.221           | 1            | 0.671           | 1          | 3.220           | <b>0.010</b> | 3.064           | 0.117        | 0.336           | 1          |
| IFI27                                         |                                   | 9.372       | <b>0.000</b>    | 7.934        | <b>0.000</b>    | 0.963        | 1               | 10.403     | <b>0.000</b>    | 9.180        | <b>0.000</b>    | 1.020        | 1               |            |
| Enriched in activated Dendritic cells LI.M165 | SERPING1                          | 3.570       | 0.197           | 2.996        | 1               | 0.307        | 1               | 5.106      | <b>0.000</b>    | 3.235        | 0.733           | -0.282       | 1               |            |
|                                               | RSAD2                             | 1.950       | 1               | 1.502        | 1               | 0.311        | 1               | 4.458      | <b>0.000</b>    | 2.438        | 1               | -0.373       | 1               |            |
|                                               | SIGLEC1                           | 3.389       | 0.273           | 2.408        | 1               | 0.899        | 1               | 4.607      | <b>0.000</b>    | 2.979        | 1               | -0.248       | 1               |            |
|                                               | IFIT3                             | 2.179       | 1               | 2.093        | 1               | 0.190        | 1               | 4.338      | <b>0.004</b>    | 2.222        | 1               | -0.572       | 1               |            |
|                                               | HESX1                             | 1.943       | 1               | 1.298        | 1               | 0.151        | 1               | 3.701      | <b>0.011</b>    | 1.880        | 1               | -0.440       | 1               |            |
|                                               | IFIT1                             | 1.698       | 1               | 1.516        | 1               | 0.156        | 1               | 4.164      | <b>0.015</b>    | 1.493        | 1               | -0.504       | 1               |            |
|                                               | TNFAIP6                           | 3.388       | 1               | 4.130        | 0.652           | -0.272       | 1               | 4.707      | <b>0.039</b>    | 4.548        | 0.145           | 0.147        | 1               |            |
| Plasma cell surface signature LIS3            | KCNN3                             | 3.264       | 0.602           | 3.074        | 1               | 1.016        | 1               | 4.974      | <b>0.000</b>    | 5.112        | <b>0.000</b>    | 0.960        | 1               |            |
|                                               | SDC1                              | 3.653       | 0.473           | 3.589        | 1               | 0.280        | 1               | 5.454      | <b>0.000</b>    | 4.965        | <b>0.010</b>    | -0.045       | 1               |            |
|                                               | CAV1                              | 2.169       | 1               | 2.174        | 1               | 0.384        | 1               | 3.548      | 0.068           | 4.091        | <b>0.013</b>    | 0.228        | 1               |            |

adj.P.Val < 0,05 in **bold**

**Supplementary Table 3.** Gene enrichment analysis: Biological processes and enriched genes in ECMO/Fatal group of patients in early-acute-response, from Figure 4B

| Enriched in ECMO/Fatal early-acute-phase |                                                 |            |          |          |           |                                               |
|------------------------------------------|-------------------------------------------------|------------|----------|----------|-----------|-----------------------------------------------|
| ID                                       | Description                                     | Gene Ratio | pval     | p.adjust | qval      | geneID                                        |
| GO:0060337                               | type I interferon signaling pathway             | 8/44       | 5.07E-11 | 1.18E-08 | 8.62E-09  | USP18/MX1/RSAD2/IFI6/IFIT3/ISG15/IFIT1/IFITM3 |
| GO:0071357                               | cellular response to type I interferon          | 8/44       | 5.07E-11 | 1.18E-08 | 8.62E-09  | USP18/MX1/RSAD2/IFI6/IFIT3/ISG15/IFIT1/IFITM3 |
| GO:0034340                               | response to type I interferon                   | 8/44       | 7.10E-11 | 1.18E-08 | 8.62E-09  | USP18/MX1/RSAD2/IFI6/IFIT3/ISG15/IFIT1/IFITM3 |
| GO:0045071                               | negative regulation of viral genome replication | 5/44       | 2.62E-07 | 3.27E-05 | 2.38E-05  | MX1/RSAD2/ISG15/IFIT1/IFITM3                  |
| GO:1903901                               | negative regulation of viral life cycle         | 5/44       | 1.64E-06 | 0.000163 | 0.0001194 | MX1/RSAD2/ISG15/IFIT1/IFITM3                  |
| GO:0045069                               | regulation of viral genome replication          | 5/44       | 2.85E-06 | 0.000236 | 0.0001728 | MX1/RSAD2/ISG15/IFIT1/IFITM3                  |
| GO:0048525                               | negative regulation of viral process            | 5/44       | 3.49E-06 | 0.000248 | 0.0001815 | MX1/RSAD2/ISG15/IFIT1/IFITM3                  |

**Supplementary Table 4.** Correlations between transcriptional profile enriched in ECMO/Fatal patients in an early acute response and clinical data.

| <b>Patient data</b>      | <b>variable</b> | <b>Spearman r</b> | <b>p value</b> |
|--------------------------|-----------------|-------------------|----------------|
| Severity                 | LI.M75          | 0.85689307        | 0.00528675     |
| Viral.load               | LI.M75          | 0.76190476        | 0.03596737     |
| Platelets                | LI.M75          | 0.43432641        | 0.74963232     |
| Neutrophiles             | LI.M75          | -0.2505701        | 0.06223806     |
| Total Leuk               | LI.M75          | 0.06694619        | 0.99071003     |
| CD3                      | LI.M75          | 0.23333333        | 0.22251962     |
| LB_CD19                  | LI.M75          | 0.25              | 0.41413315     |
| NK                       | LI.M75          | 0.5               | 0.02880326     |
| ThL_CD4                  | LI.M75          | 0.65              | 0.05350696     |
| LTC8                     | LI.M75          | 0.21666667        | 0.78445385     |
| NK_Bri.                  | LI.M75          | 0.63333333        | 0.1935741      |
| NKT                      | LI.M75          | 0.45              | 0.06822605     |
| First Symptoms<br>(Days) | LI.M75          | -0.2576726        | 0.48721103     |
| Days_in_SC               | LI.M75          | -0.1773937        | 0.57407531     |
| Days_Hosp                | LI.M75          | -0.1225921        | 0.77513642     |
| Days_Oxygen              | LI.M75          | 0.20000123        | 0.924808       |
| Days_VD                  | LI.M75          | 0.16372699        | 0.76477612     |
| Days_VM                  | LI.M75          | 0.26149879        | 0.78619544     |
| Days_ECMO                | LI.M75          | 0.49234529        | 0.50664177     |
| Severity                 | LI.M127         | 0.70999712        | 0.01931519     |
| Viral.load               | LI.M127         | 0.71428571        | 0.01910081     |
| Platelets                | LI.M127         | 0.38879219        | 0.77663659     |
| Neutrophiles             | LI.M127         | -0.0683373        | 0.02825912     |
| Total Leuk               | LI.M127         | 0.15062893        | 0.99875448     |
| CD3                      | LI.M127         | 0.13333333        | 0.27587925     |
| LB_CD19                  | LI.M127         | 0.11666667        | 0.61444963     |
| NK                       | LI.M127         | 0.43333333        | 0.043599       |
| ThL_CD4                  | LI.M127         | 0.55              | 0.0917131      |
| LTC8                     | LI.M127         | 0.1               | 0.80277039     |
| NK_Bri.                  | LI.M127         | 0.66666667        | 0.31869205     |
| NKT                      | LI.M127         | 0.35              | 0.0336826      |
| First Symptoms<br>(Days) | LI.M127         | -0.2254635        | 0.48459695     |
| Days_in_SC               | LI.M127         | -0.2956562        | 0.71677523     |
| Days_Hosp                | LI.M127         | -0.0875658        | 0.68027089     |
| Days_Oxygen              | LI.M127         | 0.1649133         | 0.96623331     |
| Days_VD                  | LI.M127         | 0.14593058        | 0.70169464     |

|                |         |            |            |
|----------------|---------|------------|------------|
| Days_VM        | LI.M127 | 0.26503256 | 0.87579895 |
| Days_ECMO      | LI.M127 | 0.5118828  | 0.57998318 |
| Severity       | LIM.150 | 0.85689307 | 0.00329104 |
| Viral.load     | LIM.150 | 0.76190476 | 0.01970578 |
| Platelets      | LIM.150 | 0.43082378 | 0.54171792 |
| Neutrophiles   | LIM.150 | -0.2095677 | 0.03529088 |
| Total Leuk     | LIM.150 | 0.05020965 | 0.78512406 |
| CD3            | LIM.150 | 0.11666667 | 0.36599842 |
| LB_CD19        | LIM.150 | 0.11666667 | 0.62433739 |
| NK             | LIM.150 | 0.36666667 | 0.04832106 |
| ThL_CD4        | LIM.150 | 0.55       | 0.09782672 |
| LTCD8          | LIM.150 | 0.11666667 | 0.98885497 |
| NK_Bri.        | LIM.150 | 0.55       | 0.29458124 |
| NKT            | LIM.150 | 0.35       | 0.04739689 |
| First Symptoms |         |            |            |
| (Days)         | LIM.150 | -0.300618  | 0.50274785 |
| Days_in_SC     | LIM.150 | -0.2069593 | 0.79472621 |
| Days_Hosp      | LIM.150 | -0.038529  | 0.88558049 |
| Days_Oxygen    | LIM.150 | 0.29824745 | 0.90044533 |
| Days_VD        | LIM.150 | 0.23491264 | 0.55384287 |
| Days_VM        | LIM.150 | 0.36044428 | 0.78353866 |
| Days_ECMO      | LIM.150 | 0.53532782 | 0.48073403 |
| Severity       | LI.M67  | 0.70999712 | 0.0172295  |
| Viral.load     | LI.M67  | 0.76190476 | 0.00747737 |
| Platelets      | LI.M67  | 0.27320532 | 0.81557709 |
| Neutrophiles   | LI.M67  | -0.2323468 | 0.06489079 |
| Total Leuk     | LI.M67  | 0.06694619 | 0.56925328 |
| CD3            | LI.M67  | 0.23333333 | 0.34494149 |
| LB_CD19        | LI.M67  | 0.25       | 0.37027055 |
| NK             | LI.M67  | 0.5        | 0.04464802 |
| ThL_CD4        | LI.M67  | 0.65       | 0.04571352 |
| LTCD8          | LI.M67  | 0.21666667 | 0.89107344 |
| NK_Bri.        | LI.M67  | 0.63333333 | 0.13118005 |
| NKT            | LI.M67  | 0.45       | 0.11053569 |
| First Symptoms |         |            |            |
| (Days)         | LI.M67  | -0.3757725 | 0.2468725  |
| Days_in_SC     | LI.M67  | -0.2956562 | 0.52503369 |
| Days_Hosp      | LI.M67  | -0.1926448 | 0.61190966 |
| Days_Oxygen    | LI.M67  | 0.04210552 | 0.7583034  |
| Days_VD        | LI.M67  | 0.07118565 | 0.96473865 |
| Days_VM        | LI.M67  | 0.1307494  | 0.89280923 |
| Days_ECMO      | LI.M67  | 0.38684273 | 0.76018116 |
| Severity       | LI.M165 | 0.6610318  | 0.0094674  |
| Viral.load     | LI.M165 | 0.47619048 | 0.00473133 |

|                          |           |            |            |
|--------------------------|-----------|------------|------------|
| Platelets                | LI.M165   | 0.59895013 | 0.40717226 |
| Neutrophiles             | LI.M165   | 0.10933969 | 0.18888938 |
| Total Leuk               | LI.M165   | -0.3179944 | 0.34193769 |
| CD3                      | LI.M165   | -0.3333333 | 0.86327871 |
| LB_CD19                  | LI.M165   | -0.3333333 | 0.88737305 |
| NK                       | LI.M165   | 0.08333333 | 0.20183057 |
| ThL_CD4                  | LI.M165   | 0.13333333 | 0.24996697 |
| LTC8                     | LI.M165   | -0.35      | 0.46462202 |
| NK_Bri.                  | LI.M165   | 0.25       | 0.36285796 |
| NKT                      | LI.M165   | 0.15       | 0.17909994 |
| First Symptoms<br>(Days) | LI.M165   | -0.3185119 | 0.58628249 |
| Days_in_SC               | LI.M165   | -0.0886969 | 0.88023967 |
| Days_Hosp                | LI.M165   | 0.03502632 | 0.96299897 |
| Days_Oxygen              | LI.M165   | 0.28070348 | 0.75513644 |
| Days_VD                  | LI.M165   | 0.22779407 | 0.49171035 |
| Days_VM                  | LI.M165   | 0.303904   | 0.65819659 |
| Days_ECMO                | LI.M165   | 0.60957036 | 0.34653176 |
| Severity                 | LI.S3     | 0.6610318  | 0.00303832 |
| Viral.load               | LI.S3     | 0.5        | 0.46641958 |
| Platelets                | LI.S3     | -0.0105079 | 0.70273403 |
| Neutrophiles             | LI.S3     | 0.10478387 | 0.93656897 |
| Total Leuk               | LI.S3     | 0.05857792 | 0.68341263 |
| CD3                      | LI.S3     | 0.33333333 | 0.68667859 |
| LB_CD19                  | LI.S3     | 0.48333333 | 0.43827637 |
| NK                       | LI.S3     | 0.61666667 | 0.16362994 |
| ThL_CD4                  | LI.S3     | 0.63333333 | 0.24142795 |
| LTC8                     | LI.S3     | 0.18333333 | 0.70582497 |
| NK_Bri.                  | LI.S3     | 0.85       | 0.20580379 |
| NKT                      | LI.S3     | 0.45       | 0.62648809 |
| First Symptoms<br>(Days) | LI.S3     | -0.0143151 | 0.62237011 |
| Days_in_SC               | LI.S3     | -0.620878  | 0.08455317 |
| Days_Hosp                | LI.S3     | -0.1856395 | 0.71076516 |
| Days_Oxygen              | LI.S3     | 0.00350879 | 0.43641078 |
| Days_VD                  | LI.S3     | -0.1423713 | 0.50712977 |
| Days_VM                  | LI.S3     | 0.12014809 | 0.31381571 |
| Days_ECMO                | LI.S3     | 0.3360452  | 0.1875933  |
| Severity                 | LI.M156.0 | 0.22034393 | 0.34995296 |
| Viral.load               | LI.M156.0 | -0.4285714 | 0.1998436  |
| Platelets                | LI.M156.0 | -0.0245184 | 0.4789934  |
| Neutrophiles             | LI.M156.0 | 0.1548979  | 0.36224943 |
| Total Leuk               | LI.M156.0 | -0.2092069 | 0.82345475 |
| CD3                      | LI.M156.0 | 0.18333333 | 0.60707643 |

|                          |            |            |            |
|--------------------------|------------|------------|------------|
| LB_CD19                  | LI.M156.0  | 0.25       | 0.31733328 |
| NK                       | LI.M156.0  | 0.38333333 | 0.77684008 |
| ThL_CD4                  | LI.M156.0  | 0.33333333 | 0.6718134  |
| LTC8                     | LI.M156.0  | -0.0166667 | 0.67959823 |
| NK_Bri.                  | LI.M156.0  | 0.35       | 0.44082141 |
| NKT                      | LI.M156.0  | 0.1        | 0.37780305 |
| First Symptoms<br>(Days) | LI.M156.0  | -0.0644181 | 0.92211177 |
| Days_in_SC               | LI.M156.0  | -0.3547874 | 0.20268935 |
| Days_Hosp                | LI.M156.0  | 0.28721585 | 0.12109956 |
| Days_Oxygen              | LI.M156.0  | 0.03157914 | 0.49104207 |
| Days_VD                  | LI.M156.0  | 0.20999766 | 0.43674399 |
| Days_VM                  | LI.M156.0  | 0.06714158 | 0.4352826  |
| Days_ECMO                | LI.M156.0  | 0.1680226  | 0.42333503 |
| Severity                 | ECMO/Fatal | 0.85689307 | 0.00039188 |
| Viral.load               | ECMO/Fatal | 0.78571429 | 0.04842799 |
| Platelets                | ECMO/Fatal | 0.42381851 | 0.58986031 |
| Neutrophiles             | ECMO/Fatal | -0.1138955 | 0.32511055 |
| Total Leuk               | ECMO/Fatal | -0.0753145 | 0.42909779 |
| CD3                      | ECMO/Fatal | -0.0666667 | 0.70703572 |
| LB_CD19                  | ECMO/Fatal | -0.0333333 | 0.59223916 |
| NK                       | ECMO/Fatal | 0.2        | 0.11415758 |
| ThL_CD4                  | ECMO/Fatal | 0.36666667 | 0.16372237 |
| LTC8                     | ECMO/Fatal | -0.0666667 | 0.55513941 |
| NK_Bri.                  | ECMO/Fatal | 0.45       | 0.22584841 |
| NKT                      | ECMO/Fatal | 0.18333333 | 0.2492875  |
| First Symptoms<br>(Days) | ECMO/Fatal | -0.2147271 | 0.72218041 |
| Days_in_SC               | ECMO/Fatal | -0.2660906 | 0.26074672 |
| Days_Hosp                | ECMO/Fatal | -0.0945711 | 0.96723995 |
| Days_Oxygen              | ECMO/Fatal | 0.23158037 | 0.72085776 |
| Days_VD                  | ECMO/Fatal | 0.21355694 | 0.59707709 |
| Days_VM                  | ECMO/Fatal | 0.30743777 | 0.57542645 |
| Days_ECMO                | ECMO/Fatal | 0.54705032 | 0.30720828 |
| Severity                 | VM+VD      | -0.6610318 | 0.01928447 |
| Viral.load               | VM+VD      | -0.4761905 | 0.07088801 |
| Platelets                | VM+VD      | -0.5253949 | 0.74920103 |
| Neutrophiles             | VM+VD      | -0.127563  | 0.54213733 |
| Total Leuk               | VM+VD      | 0.2259434  | 0.40337764 |
| CD3                      | VM+VD      | 0.01666667 | 0.513567   |
| LB_CD19                  | VM+VD      | 0          | 0.35053468 |
| NK                       | VM+VD      | -0.3666667 | 0.14110461 |
| ThL_CD4                  | VM+VD      | -0.4333333 | 0.10349041 |
| LTC8                     | VM+VD      | 0.13333333 | 0.74048611 |

|                          |       |            |            |
|--------------------------|-------|------------|------------|
| NK_Bri.                  | VM+VD | -0.5166667 | 0.10781202 |
| NKT                      | VM+VD | -0.4166667 | 0.40738376 |
| First Symptoms<br>(Days) | VM+VD | 0.50460875 | 0.35567564 |
| Days_in_SC               | VM+VD | 0.11826248 | 0.59460916 |
| Days_Hosp                | VM+VD | -0.1225921 | 0.96084685 |
| Days_Oxygen              | VM+VD | -0.4491256 | 0.4579917  |
| Days_VD                  | VM+VD | -0.1281342 | 0.63456716 |
| Days_VM                  | VM+VD | -0.4063833 | 0.45495355 |
| Days_ECMO                | VM+VD | -0.5353278 | 0.29475128 |
| Severity                 |       |            |            |

**Supplementary Table 5.** Cell surface markers used to define WBC populations by flow cytometry immunophenotyping.

| <b>Subpopulation</b> | <b>Surface Markers</b> |
|----------------------|------------------------|
| CD8 T cells          | CD45+ CD3+ CD8+        |
| CD4 T cells          | CD45+ CD3+ CD4+        |
| B cells              | CD45+ CD3- CD19+       |
| NK cells             | CD45+ CD3- CD56+       |
| NKT cells            | CD45+ CD3+ CD56+       |
